1           **Integration of sound and locomotion information by auditory cortical**  
2                                   **neuronal ensembles**

3           Carlos Arturo Vivaldo<sup>1</sup>, Joonyeup Lee<sup>1</sup>, MaryClaire Shorkey, Ajay Keerthy and Gideon  
4                                   Rothschild<sup>1,2,3,4\*</sup>

5  
6     <sup>1</sup> Department of Psychology, University of Michigan, Ann Arbor, MI 48109, USA

7     <sup>2</sup> Neuroscience Graduate Program, University of Michigan, Ann Arbor, MI 48109, USA

8     <sup>3</sup> Kresge Hearing Research Institute and Department of Otolaryngology - Head and Neck  
9     Surgery, University of Michigan, Ann Arbor, MI 48109, USA

10    <sup>4</sup> Lead Contact

11    \*Correspondence: [gid@umich.edu](mailto:gid@umich.edu)

26 **Abstract**

27 The ability to process and act upon incoming sounds during locomotion is critical for survival.  
28 Intriguingly, sound responses of auditory cortical neurons are on average weaker during  
29 locomotion as compared to immobility and these results have been suggested to reflect a  
30 computational resource allocation shift from auditory to visual processing. However, the  
31 evolutionary benefit of this hypothesis remains unclear. In particular, whether weaker sound-  
32 evoked responses during locomotion indeed reflect a reduced involvement of the auditory  
33 cortex, or whether they result from an alternative neural computation in this state remains  
34 unresolved. To address this question, we first used neural inactivation in behaving mice and  
35 found that the auditory cortex plays a critical role in sound-guided behavior during locomotion.  
36 To investigate the nature of this processing, we used two-photon calcium imaging of local  
37 excitatory auditory cortical neural populations in awake mice. We found that underlying a net  
38 inhibitory effect of locomotion on sound-evoked response magnitude, spatially intermingled  
39 neuronal subpopulations were differentially influenced by locomotion. Further, the net inhibitory  
40 effect of locomotion on sound-evoked responses was strongly shaped by elevated ongoing  
41 activity. Importantly, rather than reflecting enhanced “noise”, this ongoing activity reliably  
42 encoded the animal’s locomotion speed. Prediction analyses revealed that sound, locomotive  
43 state and their integration are strongly encoded by auditory cortical ensemble activity. Finally,  
44 we found consistent patterns of locomotion-sound integration in electrophysiologically recorded  
45 activity in freely moving rats. Together, our data suggest that auditory cortical ensembles are  
46 not simply suppressed by locomotion but rather encode it alongside sound information to  
47 support sound perception during locomotion.

48

49

50

51

52

53

54

## 55 **Introduction**

56 Continuous processing of incoming sensory information is critical for survival and adaptive  
57 behavior. Whereas studies of the neural mechanisms of sensory processing have traditionally  
58 focused on immobile subjects, some of the most critical behaviors in humans and other animal  
59 species -- such as foraging for food, seeking a mate, and evading danger -- occur during  
60 locomotion. To gain a coherent perception of the environment during locomotion and be able  
61 to rapidly guide appropriate behavior, the brain must integrate incoming external cues with  
62 one's own motion. For example, humans integrate incoming sounds with locomotion during  
63 simple walking, as manifested by the influence of modified auditory feedback on walking pace  
64 (Cuppone et al., 2018; Redd and Bamberg, 2012; Tajadura-Jiménez et al., 2015; Turchet et  
65 al., 2015; Turchet et al., 2018; Turchet et al., 2013). Moreover, auditory feedback has been  
66 shown to improve walking in aged patients and those with neurodegenerative disorders  
67 (Cornwell et al., 2020; Rodger et al., 2014; Schauer and Mauritz, 2003). Integration of sounds  
68 with self-motion has also been studied in the context of other behaviors such as dance (Karpati  
69 et al., 2015; Ravignani and Cooke, 2016) and sound-guided finger-tapping (Carr et al., 2016;  
70 Chen et al., 2008; Tierney and Kraus, 2013, 2016). In non-humans, perhaps the best known  
71 example is bat echolocation (Falk et al., 2014; Ghose et al., 2006; Moss and Surlykke, 2001) ,  
72 yet various forms of audiomotor integration have been studied in diverse animal species,  
73 including Praying mantids (Tribblehorn and Yager, 2005), Dholes (Fox, 1984) and mice (Whitton  
74 et al., 2014). Thus, the ability to process incoming sounds during locomotion and integrate  
75 them with the locomotive state of the body is fundamental in both humans and other animal  
76 species.

77 The auditory cortex is a key candidate brain region for processing incoming sounds during  
78 locomotion due to its well-established role in context-, behavior-, and decision-making-  
79 dependent sound processing (Cohen et al., 2011; Jaramillo and Zador, 2011; Kuchibhotla et  
80 al., 2017; Rodgers and DeWeese, 2014; Ulanovsky et al., 2003; Xiong et al., 2015b;  
81 Znamenskiy and Zador, 2013a). Intriguingly, previous studies have found that locomotion has  
82 a generally suppressive effect on sound-evoked responses in the auditory cortex (Bigelow et  
83 al., 2019; Schneider et al., 2014; Zhou et al., 2014). Based on these results, and the finding  
84 that responses in the primary visual cortex are generally enhanced during locomotion  
85 (Dadarlat and Stryker, 2017; Niell and Stryker, 2010; Vinck et al., 2015), it has been suggested

86 that locomotion reflects a resource allocation shift from audition to vision (Schneider et al.,  
87 2014; Zhou et al., 2014). However, the evolutionary benefit of this hypothesis remains debated  
88 (Bigelow et al., 2019), especially in nocturnal animals with poor vision such as rodents. In  
89 particular, whether weaker sound-evoked responses during locomotion indeed reflect a  
90 reduced involvement of the auditory cortex, or whether they result from an alternative neural  
91 computation in this state remains unresolved. In support of the latter possibility, studies in the  
92 visual and somatosensory cortices have revealed that locomotion itself is strongly encoded  
93 within these regions and integrated with the respective sensory cues (Ayaz et al., 2013; Ayaz  
94 et al., 2019; Saleem et al., 2013). Here we tested the hypothesis that auditory cortical  
95 ensembles are not simply suppressed by locomotion but rather explicitly encode it and  
96 incorporate it with sound information into an integrated neural code.

97 As a first step to test this hypothesis, we used neural inactivation in behaving mice to  
98 determine the involvement of the auditory cortex in sound-guided behavior during different  
99 locomotive states and found that the auditory cortex plays a critical role in sound processing  
100 during locomotion. To investigate the nature of this processing, we used two-photon calcium  
101 imaging in the auditory cortex of mice and quantified encoding of sound, locomotive state and  
102 their integration by local neuronal populations. To test whether these findings generalize to  
103 freely moving animals we examined these questions in electrophysiologically recorded auditory  
104 cortical ensembles of freely moving rats. Together, our data suggest that auditory cortical  
105 ensembles explicitly and reliably encode self-locomotion and integrate it with sound  
106 information to support sound perception during locomotion.

## 107 **Results**

### 108 *Auditory cortical activity is required for sound processing during locomotion*

109 To determine the role of the auditory cortex (AC) in sound processing during locomotion, we  
110 tested the influence of AC inactivation on sound-guided behavior during locomotion and  
111 immobility. Specifically, male and female mice were first implanted with bilateral cannula into  
112 the AC for subsequent drug delivery and allowed to recover for at least 5 days. Mice were put  
113 on water restriction and were trained on an appetitive trace conditioning task during head  
114 fixation while standing on a rotatable plate that allowed the animals to stand or run at will. In  
115 each training trial, the presentation of an 8 kHz tone was followed by a drop of water reward,

116 delivered 1 s after sound termination. Using a closed-loop system that received the output of a  
117 rotary encoder at the base of the plate, one group of mice was trained on this task wherein  
118 sounds were presented only during immobility (n=7) and the other group was trained on a  
119 similar version of the task in which sounds were presented during locomotion (n=8). Mice of  
120 both groups were trained until they learned the sound-reward association as evidenced by an  
121 increase in lick rate following the sound and before reward delivery (“predictive licking”, **Fig.**  
122 **1A, B**). To test whether AC activity is necessary for this sound-guided reward predictive  
123 behavior, we measured the influence of AC inactivation on predictive licking. To this end, we  
124 measured behavioral performance in trained mice following infusion of the GABAA receptor  
125 agonist muscimol (MUS), or inert phosphate buffer solution (PBS) as a control, into the AC  
126 (**Fig. 1C**). We found that inactivation of the AC induced a significant reduction in sound-  
127 triggered predictive licking when sounds were presented in locomotion but not in immobility  
128 (**Fig. 1C,D**). Furthermore, the reduction in predictive licking following AC inactivation was  
129 significantly larger in locomotion as compared to in immobility (**Fig. 1E**). These findings  
130 suggest that the AC plays an important role in sound-guided behavior during locomotion in  
131 mice. The finding that the AC is required for sound-guided behavior during locomotion even  
132 more than in immobility suggests that previous reports of weaker average sound-evoked  
133 responses may not reflect a reduced involvement of AC in auditory perception but rather that it  
134 carries out a different form of computation.

135

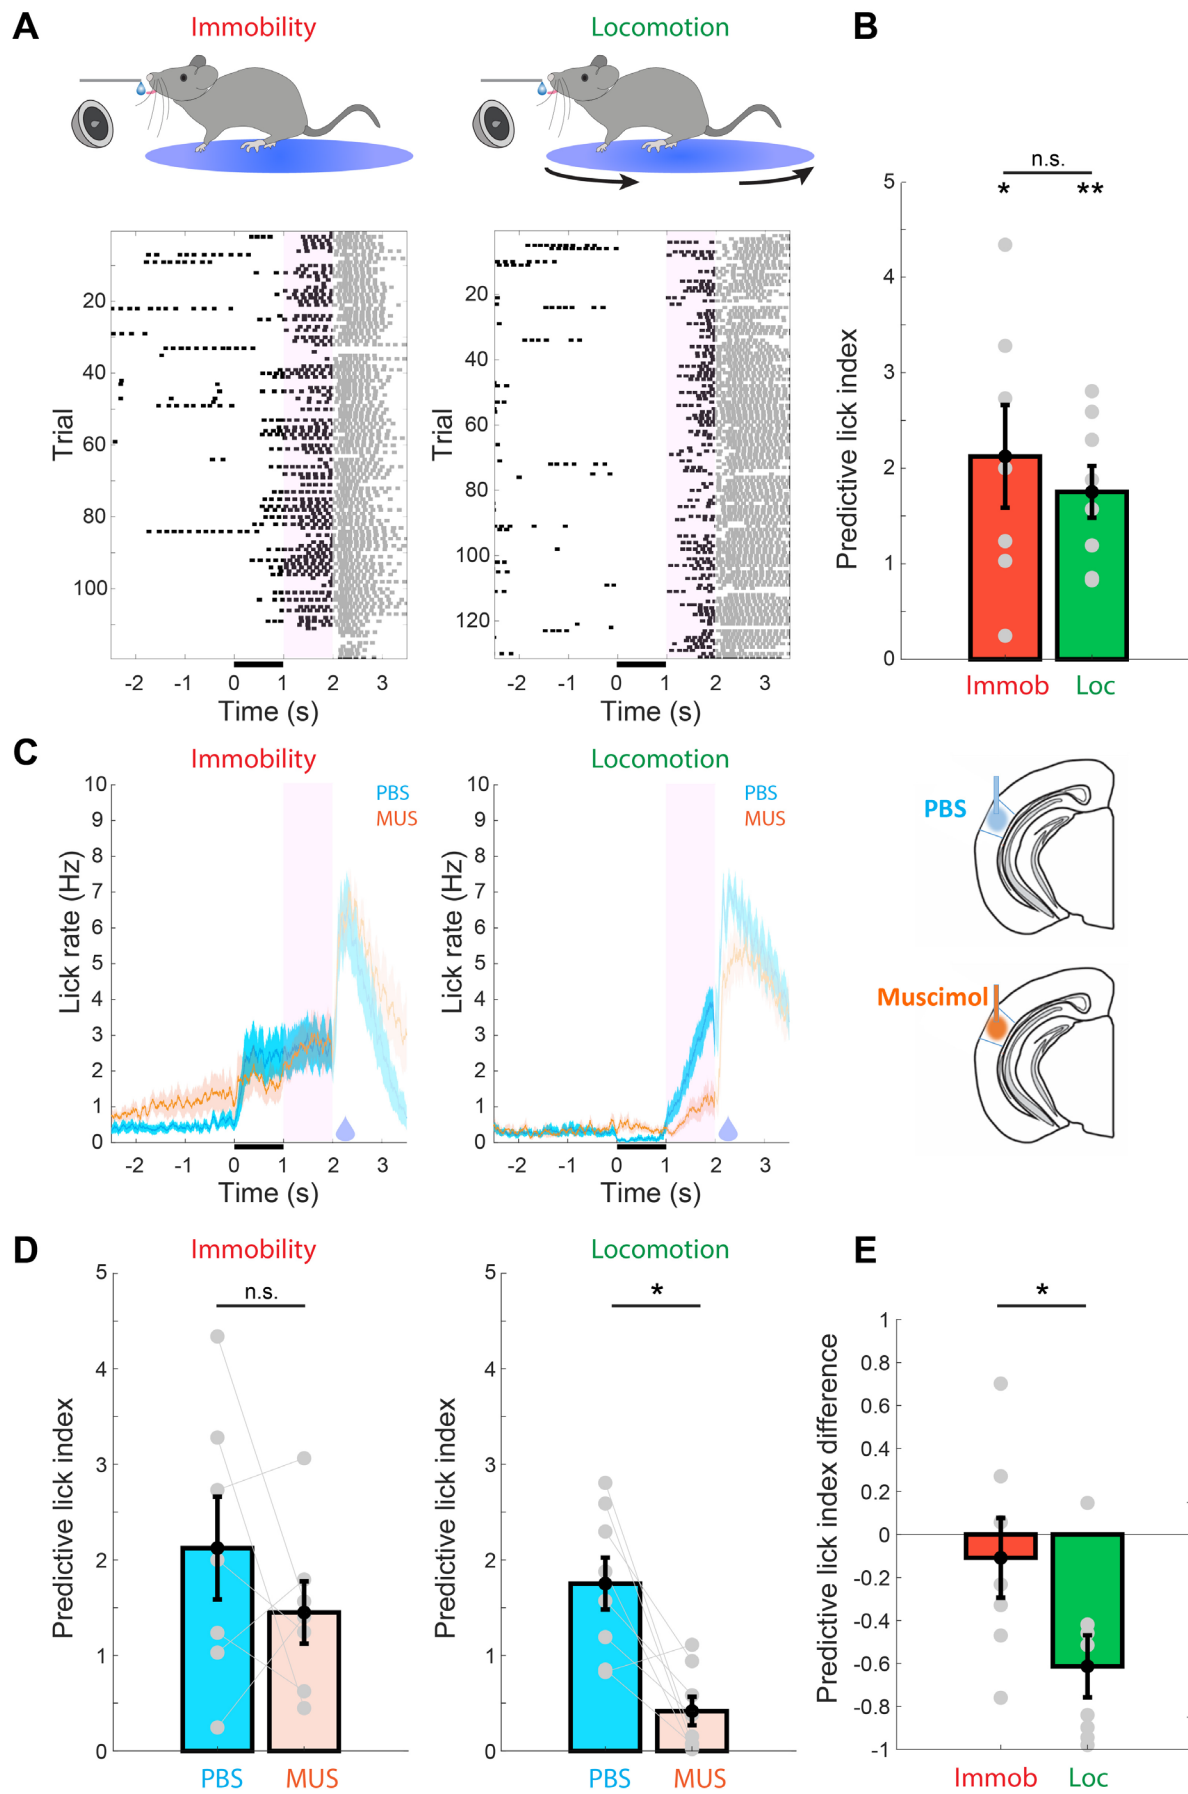

6

**Fig 1. Auditory cortical activity is necessary for sound processing during locomotion. (A)** Top: Illustration of the behavioral setup for sound-guided predictive licking in immobility (left) and locomotion (right). Bottom: Peri-sound lick histograms of example behavioral sessions from trained animals performing the task in immobility (left) and locomotion (right). Licking in the pink shaded area following sound termination represents prediction of upcoming reward (delivered at 2 s). Licks following reward delivery are shaded as they do not require sound processing or reward prediction **(B)** Animals performing the task in both immobility (n=7 mice) and locomotion (n=8 mice) exhibited significant predictive licking (Immobility:  $P=0.0156$ , Locomotion:  $P=0.0078$ , two-sided signed rank test of difference from 0) and the predictive lick index did not differ between these groups ( $P=0.6126$ , rank sum test). **(C)** Peri-sound lick histograms across animals performing the task in immobility (left) and locomotion (right) when the AC was infused with either PBS or muscimol. Solid lines denote the mean and the shaded area represents s.e.m across animals. Predictive licking in locomotion but not in immobility is clearly reduced following AC inactivation using muscimol. **(D)** Predictive lick index in immobility and locomotion following infusion of PBS or muscimol. There was a significant reduction in predictive lick index following infusion of PBS/MUS in locomotion ( $P=0.0156$ , signed rank test) but not in immobility ( $P=0.578$ , signed rank test). Error bars represent mean $\pm$ s.e.m across animals. Lines connecting gray circles represent data from the same animal in the different conditions. **(E)** The per-animal differences in predictive lick index following infusion of muscimol and PBS (negative values denote a reduction in predictive licking following muscimol relative to PBS). The reduction in predictive lick index following AC inactivation with muscimol was significantly larger in locomotion than in immobility ( $P=0.040$ , rank sum test).

138 *Locomotion differentially modulates sound-evoked responses of spatially intermingled*  
139 *subnetworks of excitatory L2/3 neurons in the auditory cortex*

140 To study the nature of information processing by local groups of L2/3 excitatory neurons  
141 (“neuronal ensembles”) of the auditory cortex (AC) during locomotion, we carried out two-  
142 photon calcium imaging in head-fixed Thy1-GCaMP6f mice that were free to stand or run at  
143 will on a rotatable plate (**Fig. 2A-C**). We first examined how locomotion modulates the  
144 responses of neurons to broad-band noise (BBN) bursts in 985 AC neurons from 7 mice, of  
145 which 612 neurons had a sufficient number of responses in both immobility and locomotion to  
146 allow for comparison. In keeping with most previous studies, we started with examining  
147 baseline-subtracted responses, which are defined as the difference between the activity  
148 evoked by the sound and the activity immediately preceding the sound. Locomotion had a  
149 diverse influence on sound-evoked responses of individual neurons, including invariance (**Fig.**  
150 **2D** neurons 1+2), suppression (**Fig. 2D** neurons 3+4) and enhancement (**Fig. 2D** neurons  
151 5+6), consistent with a recent report (Bigelow et al., 2019). Across all neurons that exhibited  
152 significant BBN-evoked responses in immobility (194/612, 31.7%), the population-average  
153 responses were significantly reduced during locomotion (**Fig. 2E**). To test whether these  
154 findings were unique to responses to BBN, we examined how locomotion modulates  
155 responses to pure tones and complex sounds. These experiments revealed a similar influence

156 of locomotion on sound evoked responses, namely a net population-average decrease that  
157 coexists with heterogeneous influences at the single-cell level (**Suppl. Fig. 1**).

158 As information is processed in the brain by groups of interacting neurons, we examined how  
159 locomotion modulates responses at the ensemble level. Notably, we observed that within the  
160 same local ensemble individual neurons often exhibited opposing locomotion-related  
161 modulation of sound-evoked responses (**Fig. 2F**). We thus wondered whether neurons whose  
162 BBN-evoked responses are similarly modulated by locomotion (suppressed/enhanced) form  
163 functional subnetworks. To this end we calculated trial-by-trial noise correlations in sound-  
164 evoked responses between pairs of simultaneously imaged neurons that both exhibited  
165 significantly suppressed responses during locomotion (114 pairs), pairs of neurons that both  
166 exhibited significantly enhanced responses during locomotion (244 pairs), and pairs of neurons  
167 in which one neuron exhibited significantly enhanced responses and the other significantly  
168 suppressed responses during locomotion (272 pairs). When calculated across all sound  
169 presentations in both behavioral states (immobility and locomotion), we confirmed that pairs of  
170 neurons whose BBN-evoked responses are similarly modulated by locomotion exhibited  
171 significantly higher noise correlations than pairs of neurons with opposing locomotion-  
172 modulation (**Fig. 2G**, left). Interestingly, we found that this pattern also held true when  
173 examining responses during locomotion only (**Fig. 2G**, middle). When examining responses  
174 during immobility only, pairs of locomotion-enhanced neurons showed higher noise  
175 correlations than pairs of neurons across classes (**Fig. 2G**, right). None of these patterns were  
176 observed in trial-shuffled data (**Suppl. Fig. 2**). Further, enhanced synchronization between  
177 pairs of neurons whose BBN-evoked responses are similarly modulated by locomotion was  
178 also observed when examining the full continuous activity traces, as evidenced by significantly  
179 enhanced peaks in activity cross-correlograms (**Fig. 2H**). Thus, beyond the influence on  
180 individual neurons, locomotion has a synchronizing effect on pairs of neurons with shared  
181 locomotion-induced modulation. These data suggest that locomotion differentially modulates  
182 sound-evoked responses of spatially-intermingled subnetworks of AC neurons.

183

184

185



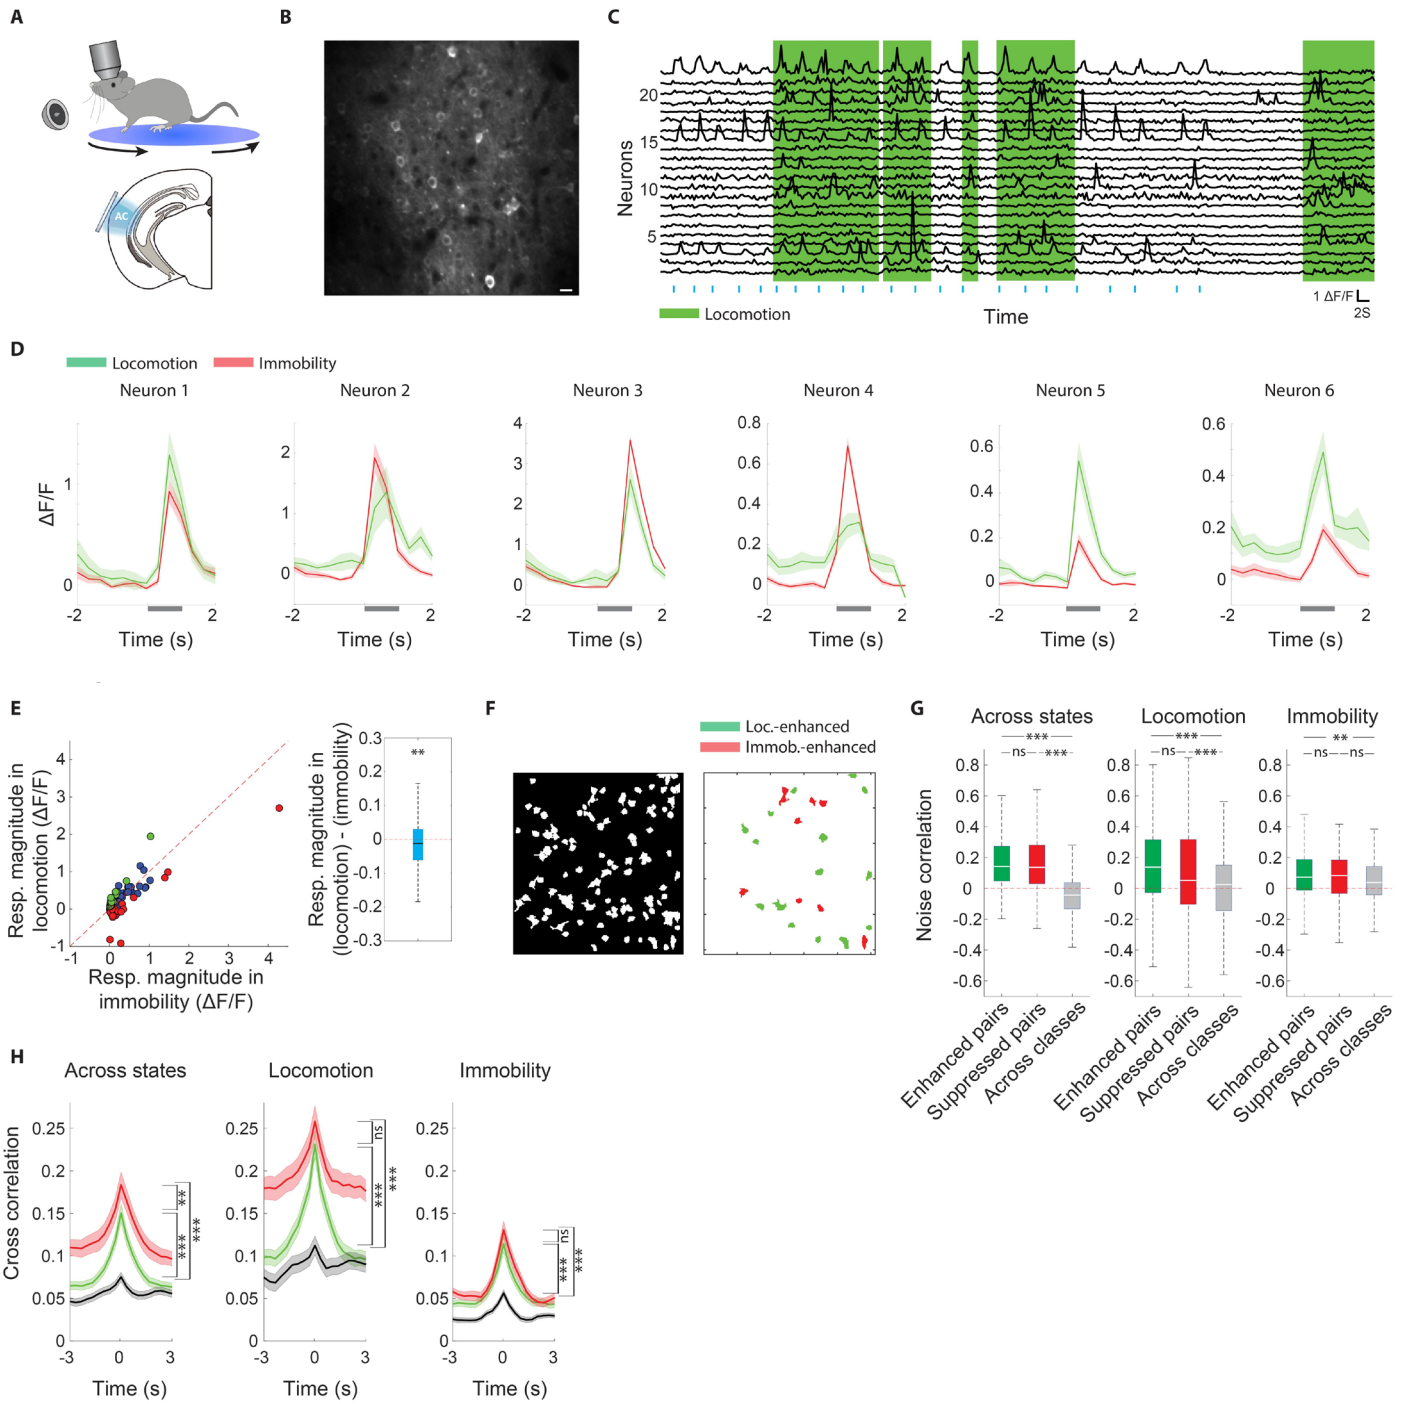

186

187

188

189

190

**Fig 2. Locomotion differentially modulates sound-evoked responses of spatially intermingled subnetworks of excitatory L2/3 neurons in the auditory cortex.** (A) Illustration of the experimental setup (B) Two-photon average micrograph of an example local neuronal ensemble in L2/3 of the auditory cortex. Scale bar: 10 $\mu$ m. (C) Relative change in fluorescence ( $\Delta F/F$ ) of 22 neurons from the micrograph in 'B' during an imaging session. Periods of locomotion are marked in green. (D) Sound-triggered peri-stimulus time histograms from 6 example neurons. Sound presentation trials in which the animal was immobile (red) and running (green) were grouped separately. Locomotion had diverse effects on sound-evoked responses of different neurons, including invariance (neurons 1+2), reduction (neurons 3+4) and enhancement (neurons 5+6) (E) Left: Sound-evoked responses in immobility and locomotion across all BBN-responsive neurons. Red and green dots represent neurons that individually exhibited a significantly stronger and weaker response during immobility, respectively. Blue dots represent neurons that did not exhibit a significant difference. Right: Box plot describing sound-evoked responses in locomotion minus immobility across all BBN-responsive neurons. The distribution was significantly lower than 0 ( $P=0.009$ , two-sided Wilcoxon signed-rank). For this and subsequent whisker plots, the central mark indicates the median, the bottom and top edges of the box indicate the 25th and 75th percentiles, respectively and the whiskers extend to the most extreme data points not considered outliers. (F) Left: shadow illustration showing the identified cell bodies from an example imaging session. Right: A corresponding illustration where neurons marked in red and green exhibit significantly weaker and stronger sound-evoked responses during locomotion, respectively. Neurons that show no significant difference are not shown. (G) Noise correlation between simultaneously imaged pairs of neurons whose sound-evoked responses were both enhanced (green), suppressed (red), or mixed (one neuron enhanced and the other suppressed, gray). All tested with One-way ANOVA and Tukey-Kramer post hoc test. Across states:  $F(2,627)=129.43$ ,  $P=8.8e-48$ , enhanced vs. across:  $P=9.6e-10$ , suppressed vs. across:  $P=9.6e-10$ , enhanced vs. suppressed:  $P=0.667$ . Locomotion:  $F(2,627)=29.41$ ,  $P=6.2e-13$ , enhanced vs. across:  $P=9.6e-10$ , suppressed vs. across:  $P=4.6e-4$ , enhanced vs. suppressed:  $P=0.073$ . Immobility:  $F(2,627)=5.54$ ,  $P=0.0041$ , enhanced vs. across:  $P=0.0027$ , suppressed vs. across:  $P=0.277$ , enhanced vs. suppressed:  $P=0.533$ . (H) Cross-correlograms of the continuous  $\Delta F/F$  traces between pairs of neurons of different locomotion-modulation categories. Across states:  $F(2,627)=32.22$ ,  $P=4.8e-14$ , enhanced vs. across:  $P=6e-8$ , suppressed vs. across:  $P=6e-8$ , enhanced vs. suppressed:  $P=0.0063$ ; Locomotion:  $F(2,627)=25.83$ ,  $P=1.7e-11$ , enhanced vs. across:  $P=2.4e-7$ , suppressed vs. across:  $P=6e-8$ , enhanced vs. suppressed:  $P=0.0737$ ; Immobility:  $F(2,627)=25.71$ ,  $P=1.9e-11$ , enhanced vs. across:  $P=6e-8$ , suppressed vs. across:  $P=6e-8$ , enhanced vs. suppressed:  $P=0.2815$

191

192 *Enhanced ongoing activity during locomotion contributes to a reduction of baseline-subtracted*  
193 *sound-evoked responses*

194 Despite the local functional heterogeneity in the influence of locomotion on sound-evoked  
195 responses, the net effect of locomotion was a reduction in baseline-subtracted responses (**Fig.**  
196 **2E**), consistent with previous reports (Bigelow et al., 2019; Schneider et al., 2014). We sought  
197 to further investigate the source of this reduction and noticed that many neurons exhibited  
198 increased ongoing activity during locomotion, which manifested as increased activity before  
199 stimulus onset (**Fig. 2D**). Across the population of BBN-responsive neurons, the average  
200 sound-triggered peri-stimulus time histogram (PSTH) exhibited a clear elevation in pre-  
201 stimulus activity during locomotion as compared to immobility (**Fig. 3A**, orange arrow). Indeed,  
202 ongoing activity was significantly higher during locomotion as compared to immobility across  
203 responsive neurons, as well as across all neurons (**Fig. 3B**). While running on the rotating

204 plate seemed to generate no noticeable sound, we wondered whether increased ongoing  
205 activity during locomotion can be attributed to processing of self-generated sounds. To this end  
206 we imaged ongoing activity of 269 neurons from 5 animals in the presence of sound-masking  
207 continuous background broad-band noise. We found that locomotion also had a population-  
208 wide average excitatory effect in the presence of background masking noise, in BBN-  
209 responsive neurons (73/269, 27% **Fig. 3C**, left) as well as across all neurons (**Fig. 3C**, right).  
210 Thus, locomotion-related increase in ongoing activity persists in the presence of background  
211 masking noise, suggesting that it is at least partly independent of self-generated sounds.

212 As ongoing, pre-stimulus activity is subtracted out in the standard calculation of sound-evoked  
213 responses, an increase in pre-stimulus activity could contribute to reduced sound-evoked  
214 responses during locomotion. To further test this possibility, we compared the influence of  
215 locomotion on activity during the pre-stimulus time window (**Fig. 3A**, orange arrow, “ongoing  
216 activity”) and stimulus time window (**Fig. 3A**, blue arrow, “evoked activity”). We found that  
217 across all BBN-responsive neurons, the influence of locomotion on activity during the pre-  
218 stimulus and stimulus time windows were highly correlated (**Fig. 3D**). Importantly, however,  
219 while locomotion was associated with increased activity in both the pre-stimulus and stimulus  
220 time windows, the locomotion-related increase in activity was significantly higher during the  
221 pre-stimulus time window (**Fig. 3D,E**). These data demonstrate that the observed average  
222 reduction in baseline-subtracted sound responses during locomotion is at least partly shaped  
223 by increased ongoing, pre-sound activity. We therefore wondered whether this enhanced  
224 baseline activity during locomotion, which is traditionally subtracted out in the calculation of  
225 sound response magnitude and seems to impair neural sound detection, may in fact reflect  
226 encoding of meaningful information for auditory cortical processing.

227

228

229

230

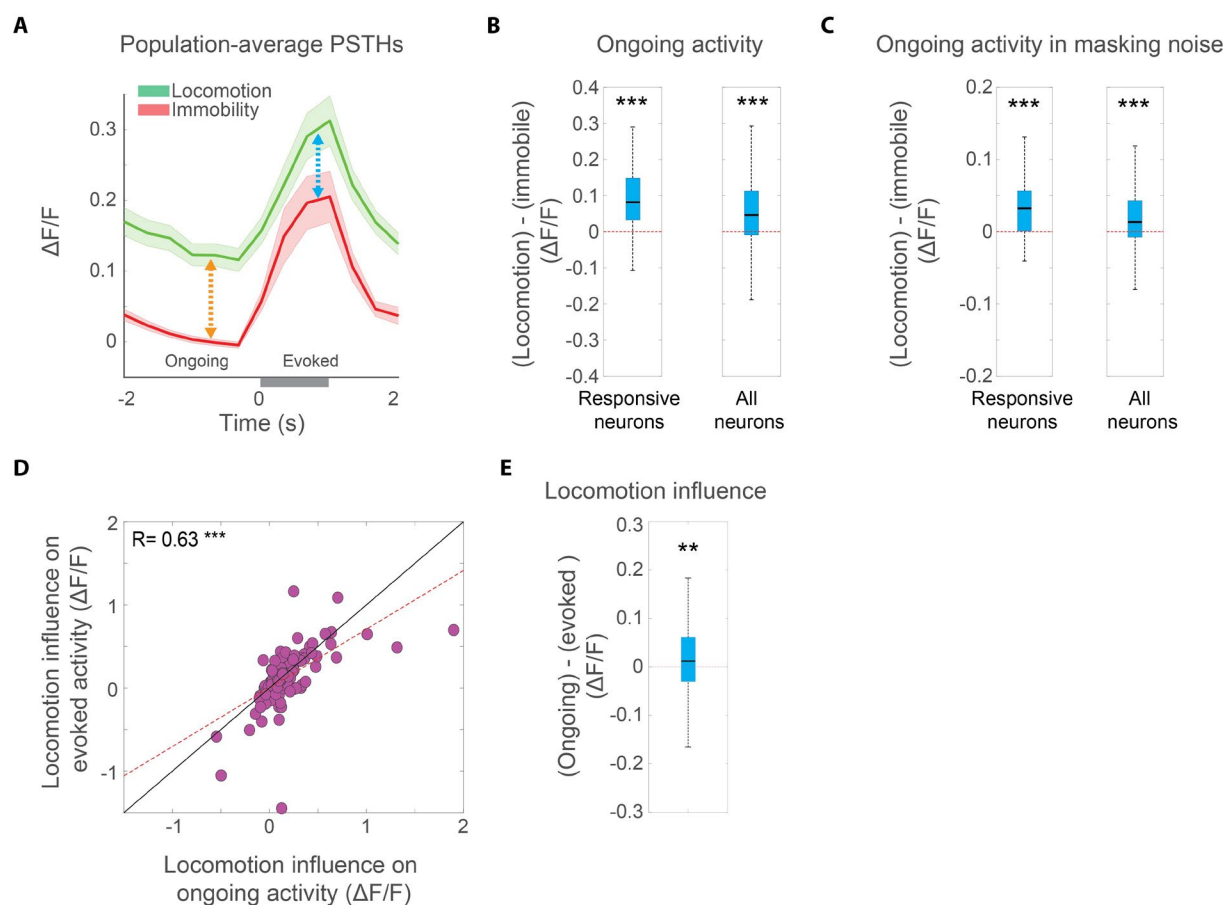

231

232

**Fig 3. Enhanced ongoing activity during locomotion contributes to a reduction of baseline-subtracted sound-evoked responses (A)** Population-level peri-stimulus time histogram across all BBN-responsive neurons during immobility (red) and locomotion (green). Solid lines and shaded areas indicate mean $\pm$ SEM. **(B)** The per-neuron difference between ongoing (pre-stimulus) activity during locomotion and immobility was significantly higher than 0 for both BBN-responsive neurons (left,  $P=2.9e^{-23}$ , two-sided Wilcoxon signed-rank test) and all neurons (right,  $P=7e^{-27}$ , two-sided Wilcoxon signed-rank test). For this and subsequent whisker plots, the central mark indicates the median, the bottom and top edges of the box indicate the 25th and 75th percentiles, respectively and the whiskers extend to the most extreme data points not considered outliers. **(C)** The per neuron difference between ongoing activity during locomotion and immobility in the presence of masking background noise is significantly higher than 0 for both BBN-responsive neurons (left,  $P=4.7e^{-7}$ , two-sided Wilcoxon signed-rank test) and all neurons (right,  $P=7.7e^{-11}$ , two-sided Wilcoxon signed-rank test). **(D)** Locomotion-related influence on ongoing activity (in the pre-stimulus time window, orange arrow in Fig. 2A) against locomotion-related influence on sound response activity (blue arrow in Fig. 2A) for all BBN-responsive neurons. Dashed red line indicates best linear fit. Pearson correlation coefficient:  $R=0.63$ ,  $P=6.7e^{-23}$ . Black line indicates the diagonal. **(E)** The per-neuron influence of locomotion on ongoing activity (orange arrow in Fig. 2A) minus the influence of locomotion on sound-evoked activity (blue arrow in Fig. 2A) was significantly positive across all BBN-responsive neurons ( $P=0.0095$ , two-sided Wilcoxon signed-rank test).

234 *Auditory cortical L2/3 neurons and ensembles reliably encode locomotion speed*

235 We wondered whether the enhanced baseline activity during locomotion, that seems to impair  
236 neural sound detection, may in fact reflect encoding of meaningful information for auditory  
237 cortical processing. In particular, we hypothesized that enhanced ongoing activity during  
238 locomotion encodes the animal's locomotion velocity. To test this hypothesis, we first asked  
239 whether neural activity of individual neurons is significantly correlated with locomotion speed.  
240 We calculated the correlations between the continuous relative change in fluorescence of each  
241 neuron and the running speed of the mouse, utilizing a large subset of our imaged neurons  
242 (647/985) that were imaged while the continuous running speed of the animal was acquired.  
243 We found that activity of auditory cortical neurons could exhibit surprisingly high positive  
244 correlations with locomotion speed (**Fig. 4A**), and in fewer cases significant negative  
245 correlations with locomotion speed (**Fig. 4B**). Across the population, 52% of neurons (335/647)  
246 showed significant positive correlation with locomotion speed, 24% of neurons (155/647)  
247 exhibited significant negative correlation with locomotion speed and 24% (157/647) showed no  
248 significant correlation with locomotion speed (**Fig. 4C**). The distribution of correlations between  
249 neural activity and locomotion speed was skewed to the right (**Fig. 4D**, skewness=0.84),  
250 consistent with our finding of a population-level enhancement in baseline activity during  
251 locomotion.

252 Interestingly, we also found that within local excitatory auditory cortical ensembles in L2/3,  
253 individual neurons exhibited high diversity in correlations between neural activity and  
254 locomotion speed (**Fig. 4E**). Within local neuronal ensembles, the average range of  
255 correlations between locomotion speed and relative change in fluorescence of the different  
256 neurons was 0.65 (**Fig. 4F**). These findings suggest that despite the net excitatory effect,  
257 locomotion modulates ongoing activity of local excitatory neuronal populations in a spatially  
258 fine-tuned manner rather than acting as a global uniform modulator.

259 To further quantify the degree of information that auditory cortical ensembles convey about  
260 locomotion speed, we implemented a cross-validated generalized linear model (GLM) to test if  
261 locomotion speed can be decoded from ongoing ensemble activity. For each imaging session  
262 of a single neuronal ensemble, a GLM was trained on a random half of the imaging session  
263 data and tested on the other half, and this procedure was repeated 200 times for robust

264 estimation. In the test phase, the GLM model that was constructed in the training phase  
 265 predicted locomotion speed based on ensemble patterns of neural activity of the test set. We

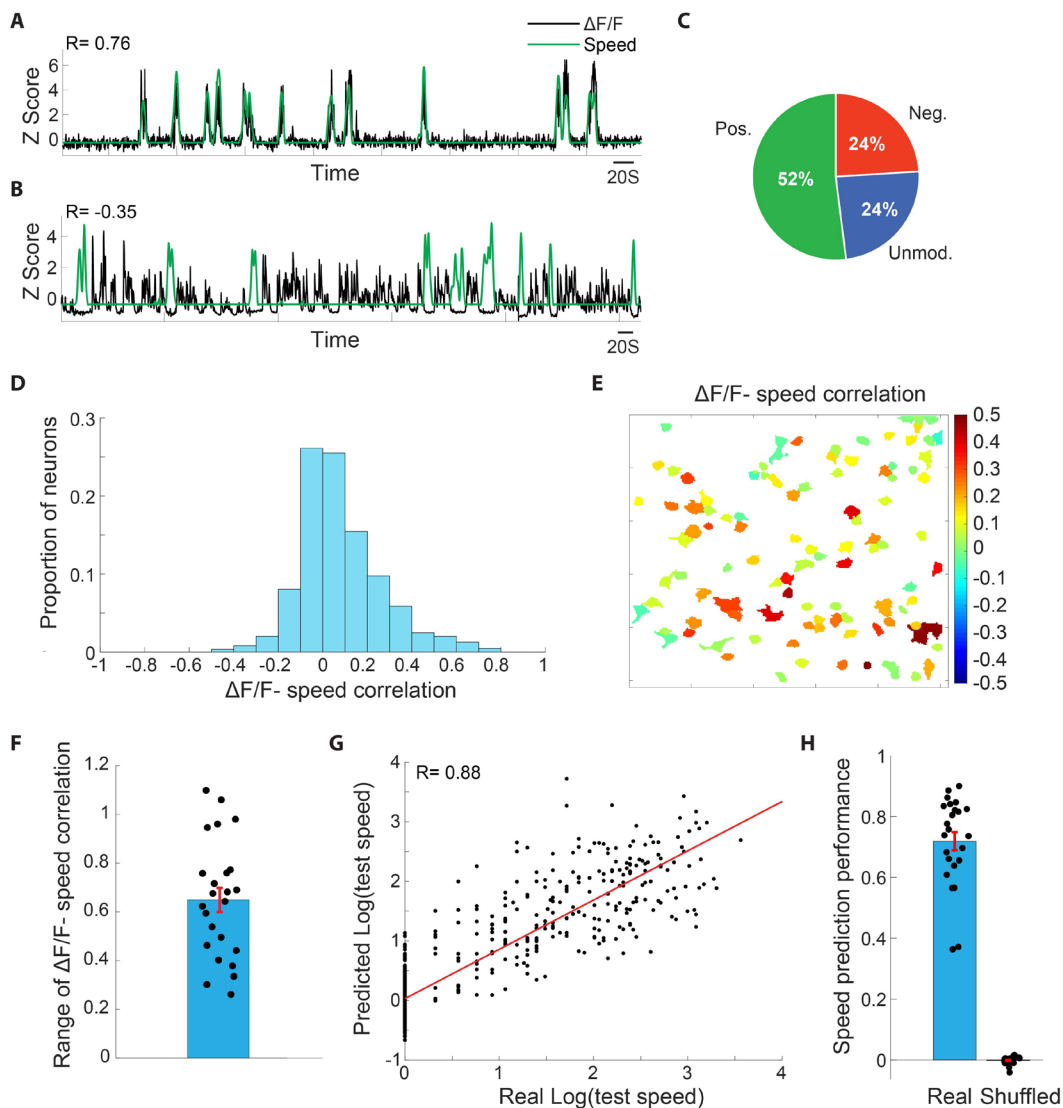

**Fig 4. Auditory cortical L2/3 neurons and ensembles reliably encode locomotion speed.** (A) Z-scored  $\Delta F/F$  of an example neuron (black trace) overlaid on the Z-scored locomotion speed of the mouse (green trace) during an example imaging session. This neuron exhibited a correlation of  $R=0.76$  with locomotion speed across the session. (B) An example from a different neuron, showing a negative correlation with locomotion speed of  $R=-0.35$ . (C) Proportions of AC L2/3 neurons showing significant positive, significant negative and non-significant correlation with locomotion speed (D) The distribution of  $\Delta F/F$ -locomotion speed correlations across the population (E) An illustration of all neurons in an example imaging session (same as in Fig. 1F), color coded according to each neuron's  $\Delta F/F$ -locomotion speed correlation value. Local ensembles exhibited a high degree of heterogeneity in correlation with locomotion speed. (F) The ensemble-level range in  $\Delta F/F$ -locomotion speed correlation values across ensembles. (G) The predicted log(speeds) of an example test-set against the real log(speeds) of that test-set, showing a correlation of 0.88. (H) Speed prediction performance, measured as the correlation values between the predicted and real locomotion speeds across ensembles. Shuffled values were derived by randomly shuffling the predicted speed values.

266 found that in many cases the predictions of the model were highly correlated with the actual  
267 speeds (**Fig. 4G**). Across ensembles, the correlation between the predicted speed and real  
268 speed averaged 0.72 (**Fig. 4H**). These findings suggest that ongoing locomotion speed is  
269 reliably encoded by the activity of local neuronal ensembles in the auditory cortex.

270

271 *Integration of sound and locomotion information by excitatory neuronal ensemble in L2/3 of the*  
272 *auditory cortex*

273 Taken together, our results suggest that excitatory neurons in L2/3 of the auditory cortex  
274 robustly encode both external sounds and locomotion. These findings raise the question of  
275 whether these two variables- external sounds and locomotion state- are simultaneously  
276 represented and integrated within the local network level. As our previous results suggest,  
277 neurons within the same ensemble exhibited a range of modulations by both locomotion state  
278 and sound (**Fig. 5A**). We thus hypothesized that ensemble-level activity patterns could provide  
279 discriminability about both of these attributes. To test this hypothesis we quantified the amount  
280 of information that each ensemble encoded about both locomotion state  
281 (immobility/locomotion) and about sound occurrence during locomotion (n=19 ensembles). To  
282 this end we implemented cross-validated support vector machine (SVM) analyses on each  
283 ensemble's neural activity patterns and quantified the predictive power that it provided to  
284 discriminate between immobility and locomotion and between sound occurrence and no sound  
285 during locomotion (**Fig. 5B**). We found that across ensembles, both locomotive state and  
286 sound occurrence during locomotion could be significantly decoded from ensemble activity.  
287 Furthermore, the activity patterns of all ensembles (19/19) could individually significantly  
288 discriminate locomotive state, and activity patterns of most ensembles (12/19) could  
289 individually significantly discriminate both locomotive state and sound occurrence (**Fig. 5C**,  
290  $P < 0.05$  bootstrap analysis). As an additional test for the ability of ensembles to encode both  
291 locomotive state and sound, we asked whether ensembles could discriminate between the four  
292 combinations of these variables: no sound in immobility, sound in immobility, no sound in  
293 locomotion and sound in locomotion. We found that AC ensembles could significantly  
294 discriminate between these 4 options better than chance and 18/19 ensembles showed  
295 individually significant discrimination, with some ensembles discriminating at 70-80% correct

296 rates (**Fig. 5D**, chance=25%). These data suggest that neuronal ensembles in L2/3 of the  
 297 auditory cortex co-encode and integrate incoming sound with locomotion information.

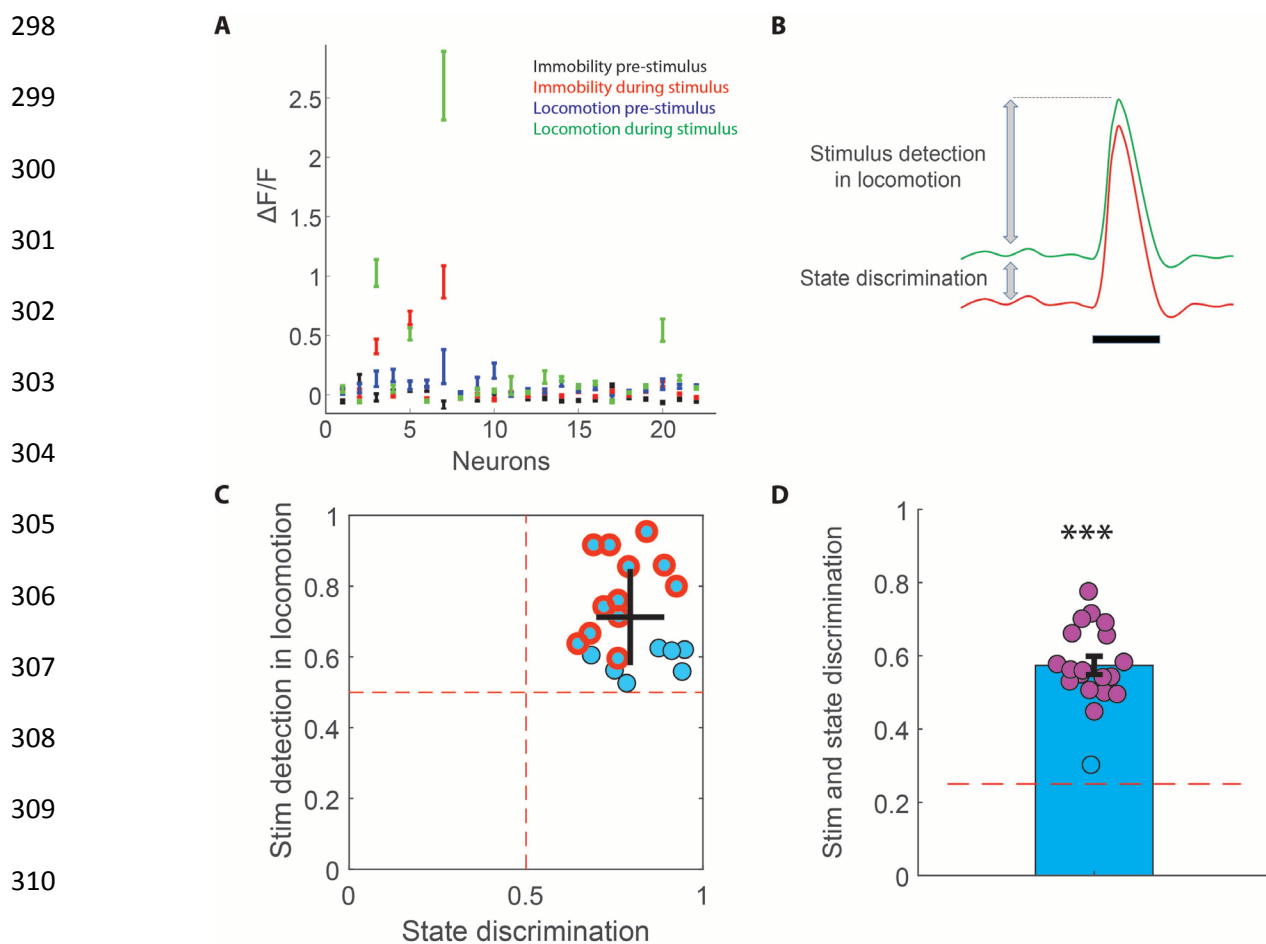

**Fig 5. Integration of sound and locomotion information by excitatory neuronal ensemble in L2/3 of the auditory cortex. (A)** Activity levels (mean $\pm$ SEM) of individual neurons in an example ensemble in four different conditions: pre-stimulus (ongoing) activity in immobility (black), sound-evoked activity during immobility (red), pre-stimulus (ongoing) activity in locomotion (blue), sound-evoked activity during locomotion (green). **(B)** Schematic illustration of the measures used for stimulus detection in locomotion and state discrimination. **(C)** Performance of stimulus detection in locomotion against state discrimination across ensembles. Blue points indicate ensembles showing significant state discrimination, red-circled points indicate ensembles showing significant stimulus detection in locomotion. Black cross shows mean $\pm$ STD of the two measures. Across ensembles, both locomotive state ( $P=1.318e^{-4}$ ) and sound detection during locomotion ( $P=1.316e^{-4}$ ) could be significantly decoded from ensemble activity (Two-sided Wilcoxon signed-rank test of difference from chance of 0.5). 10/19 ensembles individually significantly discriminated both locomotive state and sound occurrence in locomotion ( $P<0.05$ , bootstrap analysis). **(D)** Significant discrimination of the four sound/locomotion state combinations (pre-sound in immobility, sound in immobility, pre-sound in locomotion, sound in locomotion) by ensemble activity patterns ( $P=1.318e^{-4}$ , two-sided Wilcoxon signed-rank test of difference from 0.25). 18/19 could individually significantly discriminate between these 4 options ( $P<0.05$ , bootstrap analysis)



311 *Integration of sound and locomotion in the freely moving rat*

312 Finally, we wished to test whether our findings of sound-locomotion integration in head-fixed  
313 animals generalize to freely-moving animals. To this end, we analyzed electrophysiological  
314 recordings from freely-moving rats that were implanted with tetrodes in the auditory cortex  
315 (Rothschild et al., 2017). Recordings were carried out as rats traversed a Y-shaped track for  
316 food reward delivered at reward wells (**Fig. 6A**). In a pseudorandom ~25% of trials, following  
317 nose-poking in the Home well rats were presented with series of chirp-pair sounds, which  
318 signaled that subsequent reward is delivered in the Sound well. We identified putative  
319 excitatory and inhibitory interneurons based on spike waveform (**Suppl. Fig. 3**) and focused all  
320 analyses on putative excitatory neurons. We recorded a total of 248 putative excitatory  
321 neurons that had a sufficient number of responses in both immobility and locomotion to allow  
322 comparison. Of these, 21% (51/248) were significantly responsive to the target sound during  
323 immobility.

324 We first examined the effect of locomotion on baseline-subtracted sound-evoked spiking  
325 responses in freely moving rats by separating responses that occurred during immobility and  
326 locomotion. While individual neurons exhibited diverse influence by locomotion, across the  
327 population of target sound-responsive neurons, sound-evoked responses were significantly  
328 weaker during locomotion as compared to immobility (**Fig. 6B,C**), consistent with our imaging  
329 data (**Fig. 2E**) and previous reports (Bigelow et al., 2019; Schneider et al., 2014).

330 We thus sought to test whether this locomotion-related decrease in baseline-subtracted sound-  
331 evoked responses could in part be due to increased baseline firing during locomotion as our  
332 imaging data in mouse indicated. Indeed, we found that ongoing activity, measured as the  
333 spike rate preceding stimuli presentations, was significantly higher during locomotion as  
334 compared to immobility across sound-responsive neurons (**Fig. 6D-E**). Moreover, as with our  
335 imaging data, the influence of locomotion on spiking activity in the pre-stimulus and stimulus  
336 windows were highly correlated (**Fig. 6F**,  $R=0.89$ ), and significantly higher for the pre-stimulus  
337 window (**Fig. 6G**). These data suggest that increased ongoing activity during locomotion  
338 contributes to measurements of weaker sound-evoked responses in the freely-moving rat as  
339 well.

340

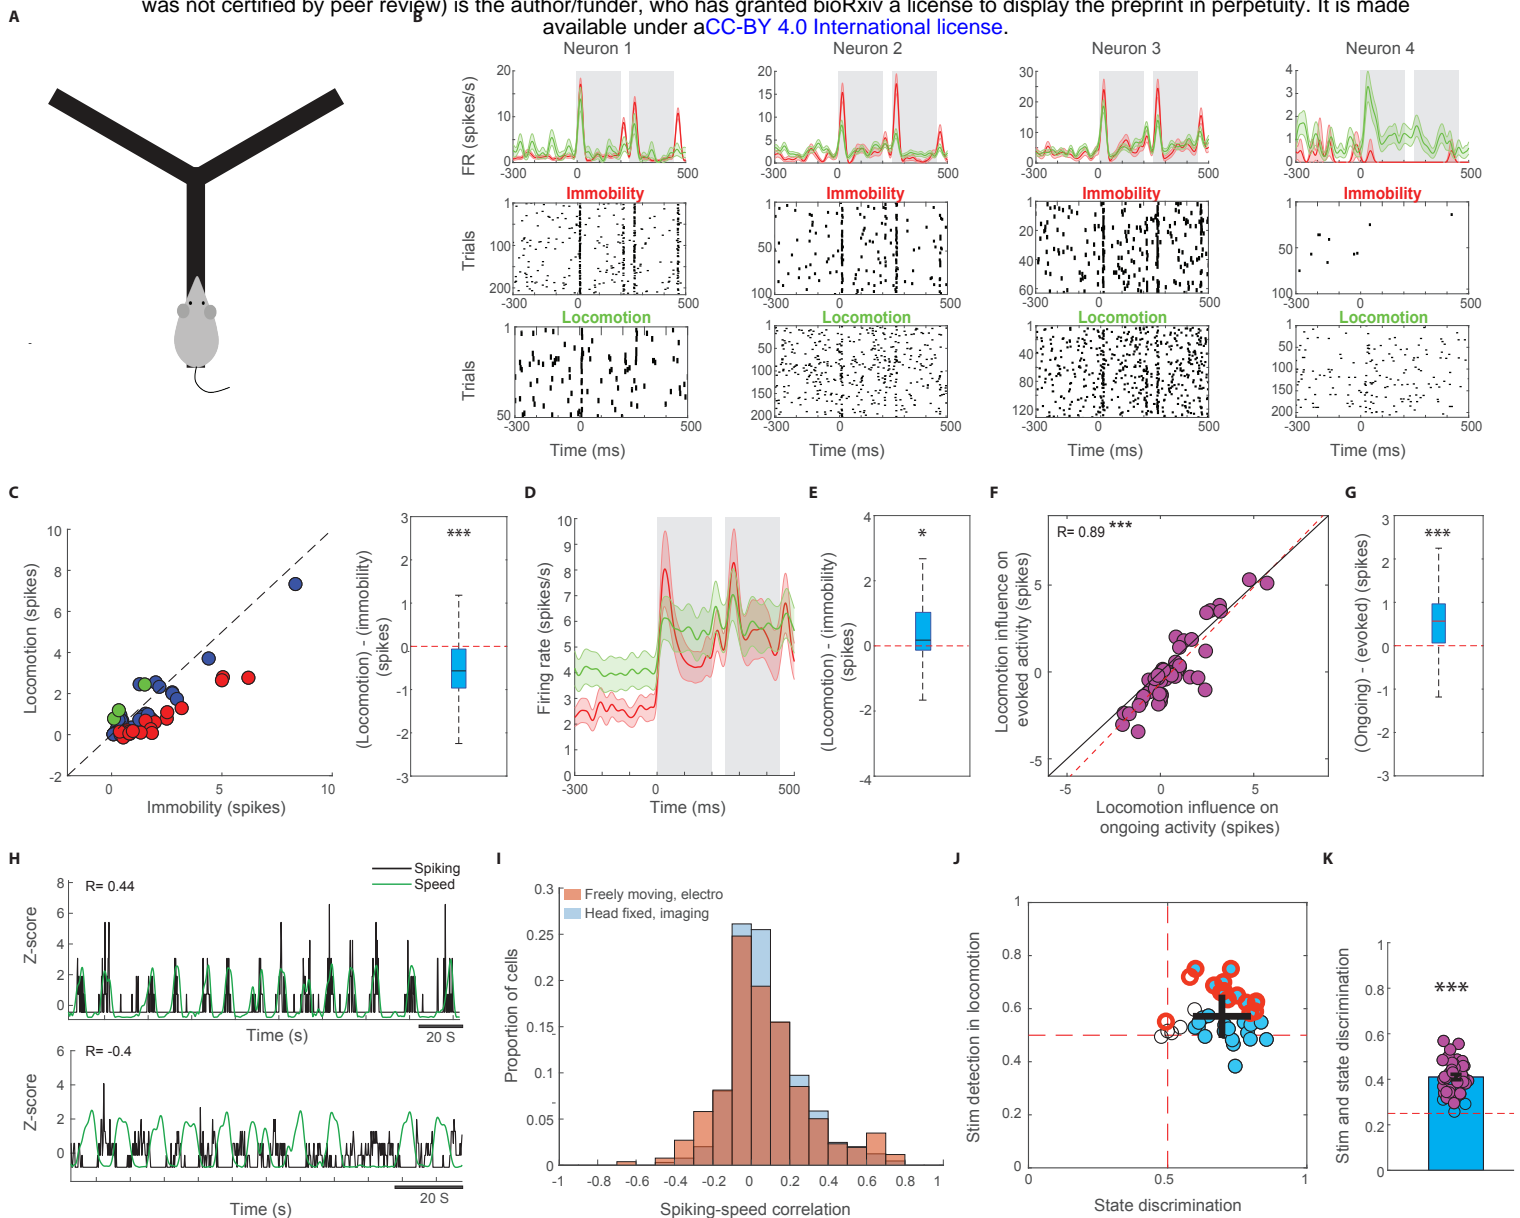

**Fig 6.** Integration of sound and locomotion in the freely moving rat **(A)** Illustration of the experimental setup for electrophysiological recordings in freely-moving rats **(B)** Sound-triggered peri-stimulus time histograms from 4 example neurons. Sound presentation trials in which the animal was immobile (red) and running (green) were grouped separately. Neurons showed diverse patterns of modulation of sound-evoked responses during locomotion **(C)** Left: Sound-evoked responses in immobility and locomotion across all target-sound responsive neurons. Red and green circles denote neurons that individually exhibited a significantly stronger and weaker response during immobility, respectively. Blue circles denote neurons that did not exhibit a significant difference. Right: The per-neuron difference in sound-evoked response between locomotion and immobility across all responsive neurons was significantly lower than 0 ( $P=3.4e-5$ , two-sided Wilcoxon signed-rank). For this and subsequent whisker plots, the central mark indicates the median, the bottom and top edges of the box indicate the 25th and 75th percentiles, respectively and the whiskers extend to the most extreme data points not considered outliers. **(D)** Population-level peri-stimulus time histogram across all target-sound responsive neurons during immobility (red) and locomotion (green). Solid lines and shaded areas indicate mean ± SEM. **(E)** The per-neuron difference between ongoing (pre-stimulus) activity during locomotion and immobility was significantly higher than 0 across target-sound responsive neurons ( $P=0.014$ , two-sided Wilcoxon signed-rank test) **(F)** Locomotion-related influence on ongoing activity (in the pre-stimulus time window) against locomotion-related influence on sound response activity for all target-sound responsive neurons. Dashed red line indicates best linear fit. Pearson correlation coefficient:  $R=0.89$ ,  $P=1.8e-18$ . Black line indicates the diagonal. **(G)** The per-neuron influence of locomotion on ongoing activity minus the influence of locomotion on sound-evoked activity was significantly positive across all target-sound responsive neurons ( $P=3.4e-5$ , two-sided Wilcoxon signed-rank test) **(H)** Top: Z-scored spiking of an example neuron (black trace) overlaid on the Z-scored locomotion speed of the rat (g trace) during an example session. This neuron exhibited a correlation of  $R=0.44$  with locomotion speed across the session. Bottom: An example from a different neuron, showing a negative correlation with locomotion speed of  $R=-0.4$ . **(I)** Distribution of spiking-locomotion speed correlation values (orange). The parallel distribution from the imaging data (Fig. 3D) is shown in light blue in the background as comparison. **(J)** Performance of stimulus detection in locomotion against state discrimination across ensembles. Blue points indicate ensembles showing significant state discrimination, red-circled points indicate ensembles showing significant stimulus detection in locomotion. Black cross shows mean ± STD of the two measures. Across ensembles, both locomotive state ( $P=7.18e-8$ ) and sound detection during locomotion ( $P=4.02e-6$ ) could be significantly decoded from ensemble activity (Two-sided Wilcoxon signed-rank test of difference from chance of 0.5) **(K)** Discrimination of the four sound/locomotion state combinations (pre-sound in immobility, sound in immobility, pre-sound in locomotion, sound in locomotion) by ensemble activity patterns. 37/40 ensembles could significantly discriminate between these 4 options ( $P<0.05$ , bootstrap analysis)

341 To test whether increased ongoing activity during locomotion encodes information about  
342 locomotion speed in the freely-moving rat, we examined correlations between continuous  
343 spiking activity and locomotion speed. We found similar results to the head-fixed mouse data,  
344 with the spiking activity of some neurons reliably tracking locomotion speed (**Fig. 6H**). Across  
345 the population, the distribution of correlation between neural activity and locomotion speed was  
346 skewed to the right, and highly similar to the distribution of the head-fixed data (**Fig. 6I**,  
347 skewness=0.64). These data suggest that auditory cortical neurons integrate information about  
348 locomotion speed with sound encoding during movement in the freely-moving rat. Finally, we  
349 carried out similar decoding analyses to the ones we implemented on the imaging data, to  
350 quantify the ability of neural ensembles (defined here as all simultaneously recorded putative  
351 excitatory neurons) to both discriminate locomotive state and detect sounds during locomotion.  
352 Despite having a substantially lower number of simultaneously recorded neurons as compared  
353 to the imaging data (mean±sem electro: 4.5±0.39, imaging: 29.3±4.6), we found that across  
354 ensembles, both locomotive state and sound occurrence during locomotion could be  
355 significantly decoded (**Fig. 6J**). Lastly, 37/40 ensembles could significantly discriminate  
356 between the four combinations of locomotion state and sound occurrence (**Fig. 6K**). These  
357 findings suggest that integration of sound and locomotion information by auditory cortical  
358 ensemble activity patterns generalizes across species, recording techniques and behavioral  
359 conditions.

360

## 361 **Discussion**

362 In this study, we tested the hypothesis that rather than being simply suppressed during  
363 locomotion, the AC performs critical computations for sound perception in this state. In support  
364 of this hypothesis, we found that AC activity is required for sound-guided behavior during  
365 locomotion, even more than in immobility. Our neural recording experiments in both head-fixed  
366 mice and freely-moving rats revealed that underlying a net inhibitory effect of locomotion,  
367 neuronal ensembles actively and robustly encode locomotion itself in addition to sound,  
368 resulting in an integrated sound-in-motion signal.

369 Previous studies have found that sound-evoked responses are on average weaker during  
370 locomotion as compared to immobility, a finding we have replicated here in both head-fixed

371 mice and freely-moving rats. A key proposed explanation for this finding is that during  
372 locomotion neural computational resources shift from auditory to visual processing (Schneider  
373 et al., 2014; Zhou et al., 2014). According to this explanation, weaker AC responses during  
374 locomotion reflect a reduced involvement of AC in sound processing in this state, in parallel to  
375 an enhancement of visual processing supported by increased responses in the visual cortex  
376 (Dadarlat and Stryker, 2017; Niell and Stryker, 2010; Vinck et al., 2015). However, the  
377 evolutionary and functional logic of this finding remains debated given the central role of sound  
378 processing during locomotion in everyday life in humans and other animals. Whether the  
379 involvement of the AC in sound processing is indeed reduced during locomotion has previously  
380 not been directly tested. Our finding that AC inactivation significantly impaired sound-guided  
381 behavior during locomotion and that this impairment was significantly larger than in immobility  
382 suggest that the AC plays an important role in sound processing during locomotion. Thus, we  
383 suspected that weaker average sound-evoked responses during locomotion reflect a different  
384 neural computation rather than a loss of function.

385 A hint as to the nature of the computation that AC neural ensembles perform during locomotion  
386 comes from parallel studies in other cortical regions. Specifically, although V1 responses are  
387 on average enhanced during locomotion, a number of studies have found that the influence of  
388 locomotion on visual cortical processing is better explained by sensory-motor integration than  
389 a general increase in gain. For example, one study found that locomotion modulates visual  
390 spatial integration by preferentially enhancing responses to larger visual objects (Ayaz et al.,  
391 2013). An additional study found that V1 neurons are tuned to weighted combinations of  
392 locomotion speed and the speed of the incoming visual stimulus, giving rise to multimodal  
393 locomotion-visual representations in V1 (Saleem et al., 2013). Based on these and additional  
394 studies (Fiser et al., 2016; Keller et al., 2012; Saleem et al., 2018), it has been suggested that  
395 beyond simple modulation of response magnitude, a key function of V1 is to integrate visual  
396 and locomotion information in ways that inform action and navigation (Parker et al., 2020).

397 Our findings suggest that cortical processing of sounds also reflect sensory-motor integration  
398 rather than simple inhibition. A first support of this possibility comes from the degree of  
399 heterogeneity in locomotion-induced modulation of activity across neurons. While early studies  
400 suggested a uniform suppression of sound-evoked responses across neurons, attributed to  
401 inhibition from secondary motor cortex (Schneider et al., 2014) and/or recruitment of local

402 interneurons (Zhou et al., 2014), later studies observed a more heterogeneous pattern  
403 (Bigelow et al., 2019). We confirmed and extended this finding by identifying spatially  
404 intermingled subnetworks of neurons that are differentially modulated by locomotion. These  
405 data are consistent with the patterns of local heterogeneity of tone-evoked responses in the  
406 AC (Bandyopadhyay et al., 2010; Bathellier et al., 2012; Rothschild and Mizrahi, 2015;  
407 Rothschild et al., 2010; Vasquez-Lopez et al., 2017; Winkowski and Kanold, 2013), and  
408 suggest that locomotion has distinct effects on different auditory cortical subpopulations rather  
409 than inducing global suppression.

410 As a further test for whether AC ensembles integrate sound and locomotion, we measured  
411 whether AC neurons encode locomotion itself, in addition to sounds. When examining sound-  
412 evoked responses we observed that many neurons, as well as the average response across  
413 all responsive neurons, exhibited elevated pre-stimulus, baseline activity during locomotion.  
414 While ongoing, pre-stimulus activity is traditionally subtracted out in the calculation of sound-  
415 evoked responses (and its elevation during locomotion therefore contributes to a reduced  
416 baseline-subtracted response), we found that it conveys a highly informative signal regarding  
417 the animal's locomotion speed. Indeed, locomotion speed coding was found to be a dominant  
418 feature of auditory cortical processing: significant encoding of locomotion speed was found in  
419 the majority of neurons and ensembles, and the combined activity of neuronal ensembles  
420 provided high-performance predictions of locomotion speed. Put together, these data suggest  
421 that locomotion speed is explicitly and reliably encoded in ongoing activity in the auditory  
422 cortex. Using a cross-validated classification approach, we found that local ensemble activity  
423 patterns significantly predicted sound occurrence, locomotive state and their combinations,  
424 suggesting co-encoding and integration of sound and locomotion information at the AC  
425 ensemble level.

426 Our data on the effect of locomotion on baseline-subtracted sound-evoked responses are  
427 consistent with previous studies that reported a population-average reduction (Bigelow et al.,  
428 2019; Schneider et al., 2014). However, while previous studies have suggested that this  
429 reflects a reduction of AC involvement in sound perception in favor of increased involvement of  
430 V1 in visual processing (Schneider et al., 2014; Zhou et al., 2014), our data suggests that a  
431 key underlying process is the explicit encoding and active integration of locomotion information  
432 into the sound-coding signal. Thus, our data suggest that cortical processing of sound during

433 locomotion may in fact share common principles with cortical processing of visual and  
434 somatosensory information, in which integrative sensory-motor processing have been found to  
435 be core features s (Ayaz et al., 2013; Ayaz et al., 2019; Fiser et al., 2016; Keller et al., 2012;  
436 Parker et al., 2020; Saleem et al., 2013; Saleem et al., 2018).

437 Our proposed role of the auditory cortex in audio-motor integration raises the question of  
438 whether this form of integration emerges first in the cortex. Audiomotor integration exists in the  
439 inferior colliculus (Yang et al., 2020), yet whether it is a result of bottom-up activity or top-down  
440 influence from the AC remains to be determined. Furthermore, the pathways and mechanisms  
441 by which audiomotor integration in AC influences motor behavior (Xiong et al., 2015a;  
442 Znamenskiy and Zador, 2013b) remain to be further explored.

#### 443 **Acknowledgments**

444 We thank Ada Eban-Rothschild, Michael Roberts, Nancy Dess, and members of the  
445 Rothschild Lab for critical comments on earlier versions of this manuscript. This work was  
446 supported by a Whitehall Foundation Research Grant #2018-08-88 (G.R.), a NARSAD Young  
447 Investigator Grant #27668 (G.R.), a Claude D. Pepper Center Grant #AG024824 (G.R.), a  
448 National Institute of Health grant 2R01MH063649 (G.R. Co-I), and a National Institute of  
449 Health training grant T32-DC000011 (C.V.)

#### 450 **Author Contributions**

451 G.R. and C.V. designed the experiments, C.V. conducted experiments, J.L. designed  
452 behavioral systems and inactivation procedures, MC.S. and A.K. conducted behavioral  
453 experiments, C.V. and G.R. analyzed the data, G.R. wrote the manuscript with input from all  
454 authors

#### 455 **Competing financial interests**

456 The authors declare no competing financial interests.

457

458

459

460

## 461 **METHODS**

462 All procedures followed laboratory animal care guidelines approved by the University of  
463 Michigan Institutional Animal Care and Use Committee and conformed to National Institutes of  
464 Health guidelines.

### 465 **Animals**

466 A total of 32 male and female Thy1-GCaMP6f mice (C57BL/6J-Tg(Thy1-  
467 GCaMP6f)GP5.17Dkim/J, JAX stock No: 025393) between the ages of 12-23 weeks were  
468 used in this study (15 in the behavioral experiments and 17 in the two-photon experiments).  
469 Mice were kept on a reverse light cycle and all imaging and behavioral sessions were  
470 performed in the dark cycle.

471 Data from 4 Long Evans male rats aged 4–5 months and weighing 450–550 g were also  
472 included in this study. Auditory cortical sleep data from these rats has been reported in an  
473 earlier study (Rothschild et al., 2017).

### 474 **Mouse surgery**

475 Mice were anesthetized with Ketamine-Xylazine or isoflurane and implanted with a custom  
476 lightweight (<1 gr.) titanium head bar. For two photon calcium imaging, the muscle overlying  
477 the right auditory cortex was removed and a 3 mm diameter glass cranial window was  
478 implanted over the right auditory cortex. For the cortical inactivation experiments, small  
479 bilateral craniotomies were drilled above the auditory cortex and either 2 mm or 3 mm length  
480 custom cannulas (Plastics One, MA) were lowered into the auditory cortex. Mice received  
481 postop antibiotic ointment and Carprofen and were allowed to recover for at least 5 days  
482 before any imaging or behavioral sessions.

### 483 **Appetitive trace conditioning and AC inactivation**

484 Mice were placed on water restriction 48 hours prior to behavioral training and received ad  
485 libitum access to food. During training and testing, mice were placed in a custom built  
486 behavioral training box, in which they were head fixed on top of a rotatable plate with an  
487 accessible water reward port. A custom Arduino-based system that received input from a  
488 rotary encoder at the base of the plate allowed presenting sounds from a speaker placed  
489 ~10cm in front of the animal in either immobility or locomotion.

490 Appetitive trace conditioning in immobility: Animals were trained to associate a 1 s 8 kHz tone  
491 with subsequent water reward delivered after a delay of 1s following sound termination.  
492 Sounds (followed by water rewards) were presented following a period of continuous  
493 immobility that randomly varied across trials between 5-10 s. If the animal ran, the immobile  
494 duration counter was reset. Animals advanced to the testing phase only after they displayed  
495 consistent post-sound reward-predictive licking in locomotion for 2 consecutive days. Animals  
496 were tested following bilateral infusion of 750 nL PBS solution into AC. 24 hours following PBS  
497 infusions animals were tested following bilateral infusions of 750 nL muscimol (1  $\mu\text{g}/\mu\text{l}$ ).  
498 Unrewarded catch trials (10% of trials) were used to validate sound-triggered licking.

499 Appetitive trace conditioning in locomotion: A different group of mice were trained on a similar  
500 task in which sounds were presented during locomotion. Specifically, mice were trained on a  
501 task in which sounds (followed by water reward) were presented exclusively in locomotion after  
502 the animal had run a distance that randomly varied across trials between 25 and 55 20ths of a  
503 full rotation. If the animal paused for longer than 2 s then the trial was reset. Animals advanced  
504 to the testing phase only after they displayed consistent post-sound reward-predictive licking in  
505 locomotion for 2 consecutive days. Unrewarded catch trials (10% of trials) and immobility trials  
506 were used to validate sound-triggered and locomotion-specific licking, respectively. Similar to  
507 the immobility conditions, mice were first tested following infusion of 750 nL PBS solution into  
508 auditory cortex and 24 hours later following muscimol infusion.

509 To quantify the association between sound and subsequent water reward, we quantified the  
510 degree of increased licking in the 1 s window following sound termination and before reward  
511 delivery (0-1000 ms from sound offset) relative to the pre-sound baseline lick rate ((-1500) – (-  
512 500) ms from sound onset). To this end we defined a “predictive lick index” as the across-trials  
513 average difference between the number of licks in the post-sound window and that of the pre-  
514 sound window.

## 515 **Two-photon imaging**

516 During imaging sessions, mice were placed on a rotating plate while being head fixed under  
517 the microscope objective. Imaging was carried out while the head of the animal was straight,  
518 with the objective tilted using an orbital nosepiece to allow optical access to the auditory  
519 cortex. Mice were allowed to initiate movement at their leisure. Imaging was performed using



520 an Ultima IV two-photon microscope (Bruker), a pulsed tunable laser (MaiTai eHP DeepSee by  
521 Spectra Physics) providing excitation light at 940nm and 16X or 40X water-immersion  
522 objectives (Nikon). Images (256X256 pixels) were acquired using galvanometric mirrors at ~3  
523 Hz to optimize signal quality and cell separation. The microscope was placed in an enclosed  
524 chamber in a dark, quiet room. Neurons were imaged at depths of 150-350  $\mu$ M, corresponding  
525 to cortical L2/3.

526 During imaging sessions, the mouse's behavior was video recorded using an infrared camera,  
527 which was synchronized offline with the imaging data acquisition. Locomotion and immobility  
528 were determined offline using semi-automatic movement-detection MATLAB code with manual  
529 thresholding and supervision. In addition, in most imaging sessions a rotary encoder was  
530 positioned at the base of the rotating plate allowing to acquire continuous locomotion speed. In  
531 a given daily imaging session, responses of the same neurons were imaged to multiple sound  
532 protocols. Different neuronal ensembles in the same mice were typically imaged on separate  
533 days.

534 Auditory stimuli were delivered via an open-field magnetic speaker (MF1, Tucker Davis  
535 Technologies) at 75 dB. The broadband noise bursts protocol consisted of 45 repeats of 1 s  
536 white noise bursts with an interstimulus interval of  $3 \pm 1$  s. The sound-masking sessions  
537 consisted of continuous presentation of broad band noise at 80 dB. The pure tone protocol  
538 (Suppl. Fig. 1) consisted of three randomly shuffled pure tones (2 kHz, 4 kHz, 8 kHz), of 20  
539 repeats, with a duration of 1s and an interstimulus interval of  $3 \pm 1$  s. The complex sound  
540 protocol (Suppl. Fig. 1) consisted of four randomly shuffled complex sounds (cricket, sparrow,  
541 scratch, water), with 20 or 9 repeats per stimulus. Complex stimuli duration ranged from 0.2-  
542 0.5s, padded with 0.8-0.2s of silence to create 1s long stimuli frames and an interstimulus  
543 interval of  $3 \pm 1$  s.

#### 544 **Imaging data preprocessing and analysis**

545 Daily imaging data of the same ensemble across multiple sound protocols was concatenated  
546 and then preprocessed using the open source Suite2P software (Pachitariu et al., 2017) for  
547 movement correction and neuronal ROI detection within the ensemble. Neural data, sound  
548 stimuli and locomotion speed signals were aligned.

549 Data analysis was performed using custom software written in Matlab (MathWorks).

550 Relative change in fluorescence ( $\Delta F/F$ ) across time ( $t$ ) was calculated for each detected cell as  
551  $\frac{F(t) - \text{median}(F)}{\text{median}(F)}$ , where  $F(t)$  is the mean brightness of the cell's pixels at time  $t$ .

552 For determination of BBN-responsiveness of individual neurons and quantification of activity in  
553 the pre-stimulus time window (Ongoing) and stimulus time window (Evoked), the mean  $\Delta F/F$   
554 was taken across 1-4 samples preceding stimulus onset (corresponding to  $\sim -1.2 - 0$  s), and 1-  
555 4 samples following stimulus onset (corresponding to  $\sim 0 - 1.2$  s), respectively. A cell was  
556 determined as BBN-responsive if  $\Delta F/F$  during the stimulus time window was significantly  
557 higher than during the pre-stimulus time window using a one-tailed paired t-test at  $P < 0.05$   
558 across all immobile trials. Ongoing activity levels in immobility/locomotion in the presence of  
559 background masking noise was quantified as the average  $\Delta F/F$  across all time points of  
560 immobility/locomotion in the session.

561 A difference in BBN-evoked response magnitude between immobility and locomotion was  
562 determined using an unpaired two-sided t-test (at  $P < 0.05$ ) of the response magnitudes during  
563 the immobility and locomotion trials. Neurons with 8 or fewer responses in either state  
564 (immobility/locomotion) were excluded from immobility/locomotion comparisons. To determine  
565 a difference in the influence of locomotion on responses to tones and complex sounds,  
566 locomotion and immobility trials of each stimulus were compared separately.

567 Noise correlations between pairs of simultaneously imaged neurons were calculated as the  
568 Pearson correlation between their trial-by-trial baseline-subtracted sound responses. Cross-  
569 correlations between pairs of simultaneously imaged neurons were calculated as the cross-  
570 correlation between their continuous  $\Delta F/F$  traces. Cross-correlations were normalized such  
571 that the autocorrelations at zero lag equal 1. Noise correlations and cross-correlations were  
572 calculated separately between pairs of neurons whose sound-evoked responses were (1) Both  
573 significantly enhanced during locomotion, (2) Both significantly suppressed during locomotion  
574 and (3) One neuron significantly enhanced and the other significantly suppressed during  
575 locomotion. A difference in the peak of cross-correlations between groups was tested by taking  
576 the maximum values of each cross-correlogram within a lag of  $\pm 0.66$  and comparing these  
577 values across groups using a one-way ANOVA.

578 For calculating  $\Delta F/F$ -locomotion speed correlations and speed prediction, the daily locomotion  
579 speed was smoothed using a 6-sample ( $\sim 2$  s) moving average filter. The  $\Delta F/F$ -locomotion

580 speed correlation was calculated as the Pearson correlation between the continuous  $\Delta F/F$   
581 trace of each neuron and the animal's locomotion speed.

582 Speed prediction was carried out using cross-validated generalized linear models on the day's  
583 ensemble continuous activity patterns and locomotion speed. For a given ensemble, the data  
584 included the daily continuous locomotion speed and  $\Delta F/F$  traces of all cells.  $\Delta F/F$  traces of  
585 each cell were smoothed using a 3-sample ( $\sim 1$  s) moving average filter. Locomotion speed in  
586 cm/s was log-transformed using  $\log(\text{speed} + 1)$ . In the model training phase, a random half of  
587 the daily sample points ("training set") of locomotion and corresponding ensemble  $\Delta F/F$  values  
588 were used to train a generalized linear model. In the test phase, the model used the remaining  
589 ensemble  $\Delta F/F$  values ("test set") to predict the corresponding (log) locomotion speeds.  
590 Prediction performance was quantified by the Spearman correlation between the predicted  
591 speeds and the real speeds. This procedure was repeated 200 times and the correlation  
592 values averaged across repeats to yield the final prediction performance. Repeats in which the  
593 test set included fewer than 10 non-zero speed values were excluded.

594 Stimulus detection during locomotion was quantified using cross-validated SVM analyses. Only  
595 ensembles with more than 10 cells and 12 trials in both immobility and locomotion were  
596 included in the decoding analyses. Data consisted of all ensemble activity patterns before BBN  
597 presentation (i.e., across-trials ensemble activity in the pre-stimulus time windows) and during  
598 BBN presentation (i.e., across-trials ensemble activity in the stimulus time windows) that  
599 occurred during locomotion. An SVM model was constructed on this data and a 10-fold cross  
600 validation was used to estimate the ability of the ensemble to discriminate between the pre-  
601 stimulus and stimulus ensemble activity patterns. Detection performance was defined as the  
602 across-fold average of percent correct predictions. To estimate significance of prediction, this  
603 procedure was performed 200 times on shuffled data identity and significant detection was  
604 determined if detection performance was higher than 95% of shuffles. Discrimination of  
605 locomotion state (immobility/locomotion) was carried out in a similar manner, but using (1) The  
606 ensemble activity patterns during the pre-stimulus time windows in immobility and (2) The pre-  
607 stimulus time windows in locomotion, as the data to be discriminated. Discrimination between  
608 the four combinations of sound occurrence and locomotion state was carried out similarly  
609 using a linear discriminant analysis, but using the ensemble activity patterns during (1) Pre-  
610 stimulus time windows in immobility (2) Pre-stimulus time windows in locomotion (3) Stimulus

611 time windows in immobility (4) Stimulus time windows in locomotion, as the data to be  
612 discriminated. The same number of trials was included in the three models (stimulus detection  
613 during locomotion, state discrimination and stimulus+state discrimination) by removing excess  
614 trials in the data with more trials.

615 Analysis of the electrophysiology data was carried out similarly to the imaging data, but using  
616 spike counts instead of  $\Delta F/F$  as the neural measure and using a stimulus response time  
617 window of 1-450 ms and a pre-stimulus time window of -450-0 ms relative to sound onset.  
618 Neurons with 10 or fewer responses in either state (immobility/locomotion) were excluded from  
619 immobility/locomotion comparisons. A minimum of 20 trials in both immobility and locomotion  
620 were required for inclusion in the decoding analyses. Spiking-speed correlations were  
621 calculated by binning spiking and speeds into 200 ms bins and calculating the Spearman  
622 correlation. Discrimination between the 4 state/sound combinations were carried out using a  
623 pseudolinear discriminant analysis.

#### 624 **Rat pretraining, surgery and electrophysiological recordings**

625 The rat behavioral and surgery procedures have been described previously (Znamenskiy and  
626 Zador, 2013a). Briefly, after habituation to daily handling over several weeks, rats were  
627 pretrained to run on an E-shaped raised track for liquid food rewards (sweetened condensed  
628 milk). Rats were then implanted with a microdrive array with 21 independently moveable  
629 tetrodes (groups of four twisted 12.5  $\mu\text{m}$  nichrome wires assembled in a bundle). Seven  
630 tetrodes were targeted to the left primary AC (-4.8 mm AP, 5.5 mm ML, 25° lateral from  
631 midline). Other tetrodes targeted left dorsal CA1 region of the hippocampus and left PFC, but  
632 these data are not included here. Over the course of two weeks following implantation, AC  
633 tetrodes were advanced gradually and responses to sound stimuli were used to validate  
634 approach to primary AC.

635 Data were collected using the NSpike data acquisition system (L.M. Frank and J. MacArthur,  
636 Harvard Instrumentation Design Laboratory). Spike data were sampled at 30 kHz, digitally  
637 filtered between 300 Hz and 6 kHz (two-pole Bessel for high and low pass) and threshold  
638 crossing events were saved to disk (40 samples at 30 kHz). Individual units (putative single  
639 neurons) were identified by clustering spikes using peak amplitude, principal components and  
640 spike width as variables (MatClust). Behavior sessions were recorded with an overhead

641 monochrome CCD camera (30 fps) and the animal's position and speed were detected using  
642 an infrared light emitting diode array with a large and a small cluster of diodes attached to the  
643 preamps. For binary assignment of immobility and locomotion we used a standard 4 cm/s  
644 speed threshold.

645 Approximately 14 d after implantation, animals were introduced to the Y-track and data gathering  
646 commenced. Animals were trained on the Y-track for 10–12 d in 3–4 20-min training sessions  
647 per day with interleaving 20- to 30-min sleep sessions in the rest box. Data for each neuron was  
648 pooled across daily sessions. During training sessions, sweetened condensed milk rewards  
649 were automatically delivered in food wells triggered by animal's nose-poke crossing of an IR  
650 beam. Rats initiated each trial by a nose-poke in the home well and receiving a reward. In ~75%  
651 of trials the next reward was delivered in the silent well if the rat nose-poked there. In a  
652 pseudorandom ~25% of trials (sound trials separated by 2–5 silent trials), 5 s after nose-poking  
653 in the home arm, a target sound series was emitted from a speaker, indicating that the next  
654 reward would be delivered in the sound well if the rat next nose-poked there. The speaker was  
655 placed at the end of the sound arm in the first days of training and moved to the center junction  
656 after rats displayed consistent correct choices in more than ~70% of trials. The target sound was  
657 a pair of upward chirps, consisting of one 200-ms chirp with frequency modulated from 3 to 4  
658 kHz, an interchirp interval of 50 ms, and a second 200-ms chirp with frequency modulated from  
659 9 to 12 kHz. The series of target sounds was presented at 1 Hz and stopped after 12 s or once  
660 the rat made a correct or incorrect choice by a nose-poke in one of the wells. Reward amount in  
661 the sound well was double the reward amount in the home or silent well. Following the Y-track  
662 training days, two rats continued to perform the same task on a W-shaped track for an additional  
663 3 days.

664

665 **Data and code availability.** Source data and analysis scripts have been deposited with FigShare  
666 (10.6084/m9.figshare.19750678).

667

668

669

- 670 1. Ayaz, A., Saleem, A.B., Scholvinck, M.L., and Carandini, M. (2013). Locomotion controls spatial  
671 integration in mouse visual cortex. *Curr Biol* 23, 890-894.
- 672 2. Ayaz, A., Stauble, A., Hamada, M., Wulf, M.A., Saleem, A.B., and Helmchen, F. (2019). Layer-specific  
673 integration of locomotion and sensory information in mouse barrel cortex. *Nat Commun* 10, 2585.
- 674 3. Bandyopadhyay, S., Shamma, S.A., and Kanold, P.O. (2010). Dichotomy of functional organization in the  
675 mouse auditory cortex. *Nat Neurosci* 13, 361-368.
- 676 4. Bathellier, B., Ushakova, L., and Rumpel, S. (2012). Discrete neocortical dynamics predict behavioral  
677 categorization of sounds. *Neuron* 76, 435-449.
- 678 5. Bigelow, J., Morrill, R.J., Dekloe, J., and Hasenstaub, A.R. (2019). Movement and VIP Interneuron  
679 Activation Differentially Modulate Encoding in Mouse Auditory Cortex. *eNeuro* 6.
- 680 6. Carr, K.W., Tierney, A., White-Schwoch, T., and Kraus, N. (2016). Intertrial auditory neural stability  
681 supports beat synchronization in preschoolers. *Dev Cogn Neuros-Neth* 17, 76-82.
- 682 7. Chen, J.L., Penhune, V.B., and Zatorrel, R.J. (2008). Moving on time: Brain network for auditory-motor  
683 synchronization is modulated by rhythm complexity and musical training. *J Cognitive Neurosci* 20, 226-  
684 239.
- 685 8. Cohen, L., Rothschild, G., and Mizrahi, A. (2011). Multisensory integration of natural odors and sounds in  
686 the auditory cortex. *Neuron* 72, 357-369.
- 687 9. Cornwell, T., Woodward, J., Wu, M.M., Jackson, B., Souza, P., Siegel, J., Dhar, S., and Gordon, K.E. (2020).  
688 Walking With Ears: Altered Auditory Feedback Impacts Gait Step Length in Older Adults. *Frontiers in*  
689 *Sports and Active Living* 2.
- 690 10. Cuppone, A.V., Cappagli, G., and Gori, M. (2018). Audio Feedback Associated With Body Movement  
691 Enhances Audio and Somatosensory Spatial Representation. *Frontiers in Integrative Neuroscience* 12.
- 692 11. Dadarlat, M.C., and Stryker, M.P. (2017). Locomotion Enhances Neural Encoding of Visual Stimuli in  
693 Mouse V1. *J Neurosci* 37, 3764-3775.
- 694 12. Falk, B., Jakobsen, L., Surlykke, A., and Moss, C.F. (2014). Bats coordinate sonar and flight behavior as  
695 they forage in open and cluttered environments. *J Exp Biol* 217, 4356-4364.
- 696 13. Fiser, A., Mahringer, D., Oyibo, H.K., Petersen, A.V., Leinweber, M., and Keller, G.B. (2016). Experience-  
697 dependent spatial expectations in mouse visual cortex. *Nat Neurosci* 19, 1658-1664.
- 698 14. Fox, M.W. (1984). *The whistling hunters : field studies of the Asiatic wild dog (Cuon alpinus)* (Albany:  
699 State University of New York Press).
- 700 15. Ghose, K., Horiuchi, T.K., Krishnaprasad, P.S., and Moss, C.F. (2006). Echolocating bats use a nearly time-  
701 optimal strategy to intercept prey. *Plos Biol* 4, 865-873.
- 702 16. Jaramillo, S., and Zador, A.M. (2011). The auditory cortex mediates the perceptual effects of acoustic  
703 temporal expectation. *Nat Neurosci* 14, 246-U340.
- 704 17. Karpati, F.J., Giacosa, C., Foster, N.E.V., Penhune, V.B., and Hyde, K.L. (2015). Dance and the brain: a  
705 review. *Ann Ny Acad Sci* 1337, 140-146.
- 706 18. Keller, G.B., Bonhoeffer, T., and Hubener, M. (2012). Sensorimotor mismatch signals in primary visual  
707 cortex of the behaving mouse. *Neuron* 74, 809-815.
- 708 19. Kuchibhotla, K.V., Gill, J.V., Lindsay, G.W., Papadoyannis, E.S., Field, R.E., Sten, T.A.H., Miller, K.D., and  
709 Froemke, R.C. (2017). Parallel processing by cortical inhibition enables context-dependent behavior. *Nat*  
710 *Neurosci* 20, 62-71.
- 711 20. Moss, C.F., and Surlykke, A. (2001). Auditory scene analysis by echolocation in bats. *J Acoust Soc Am*  
712 110, 2207-2226.
- 713 21. Niell, C.M., and Stryker, M.P. (2010). Modulation of visual responses by behavioral state in mouse visual  
714 cortex. *Neuron* 65, 472-479.
- 715 22. Pachitariu, M., Stringer, C., Dipoppa, M., Schröder, S., Rossi, L.F., Dalgleish, H., Carandini, M., and Harris,  
716 K.D. (2017). Suite2p: beyond 10,000 neurons with standard two-photon microscopy. *bioRxiv*, 061507.

- 717 23. Parker, P.R.L., Brown, M.A., Smear, M.C., and Niell, C.M. (2020). Movement-Related Signals in Sensory  
718 Areas: Roles in Natural Behavior. *Trends Neurosci* 43, 581-595.
- 719 24. Ravnani, A., and Cooke, P.F. (2016). The evolutionary biology of dance without frills. *Current Biology*  
720 26, R878-R879.
- 721 25. Redd, C.B., and Bamberg, S.J.M. (2012). A Wireless Sensory Feedback Device for Real-Time Gait  
722 Feedback and Training. *Ieee-Asme T Mech* 17, 425-433.
- 723 26. Rodger, M.W.M., Young, W.R., and Craig, C.M. (2014). Synthesis of Walking Sounds for Alleviating Gait  
724 Disturbances in Parkinson's Disease. *Ieee T Neur Sys Reh* 22, 543-548.
- 725 27. Rodgers, C.C., and DeWeese, M.R. (2014). Neural Correlates of Task Switching in Prefrontal Cortex and  
726 Primary Auditory Cortex in a Novel Stimulus Selection Task for Rodents. *Neuron* 82, 1157-1170.
- 727 28. Rothschild, G., Eban, E., and Frank, L.M. (2017). A cortical-hippocampal-cortical loop of information  
728 processing during memory consolidation. *Nat Neurosci* 20, 251-259.
- 729 29. Rothschild, G., and Mizrahi, A. (2015). Global order and local disorder in brain maps. *Annu Rev Neurosci*  
730 38, 247-268.
- 731 30. Rothschild, G., Nelken, I., and Mizrahi, A. (2010). Functional organization and population dynamics in the  
732 mouse primary auditory cortex. *Nat Neurosci* 13, 353-360.
- 733 31. Saleem, A.B., Ayaz, A., Jeffery, K.J., Harris, K.D., and Carandini, M. (2013). Integration of visual motion  
734 and locomotion in mouse visual cortex. *Nat Neurosci* 16, 1864-1869.
- 735 32. Saleem, A.B., Diamanti, E.M., Fournier, J., Harris, K.D., and Carandini, M. (2018). Coherent encoding of  
736 subjective spatial position in visual cortex and hippocampus. *Nature* 562, 124-127.
- 737 33. Schauer, M., and Mauritz, K.-H. (2003). Musical motor feedback (MMF) in walking hemiparetic stroke  
738 patients: randomized trials of gait improvement. *Clinical Rehabilitation* 17, 713-722.
- 739 34. Schneider, D.M., Nelson, A., and Mooney, R. (2014). A synaptic and circuit basis for corollary discharge in  
740 the auditory cortex. *Nature* 513, 189-194.
- 741 35. Tajadura-Jiménez, A., Basia, M., Deroy, O., Fairhurst, M., Marquardt, N., and Bianchi-Berthouze, N.  
742 (2015). As Light as your Footsteps: Altering Walking Sounds to Change Perceived Body Weight,  
743 Emotional State and Gait. CHI '15 Proceedings of the 33rd Annual ACM Conference on Human Factors in  
744 Computing Systems, 2943-2952.
- 745 36. Tierney, A., and Kraus, N. (2013). The Ability to Move to a Beat Is Linked to the Consistency of Neural  
746 Responses to Sound. *Journal of Neuroscience* 33, 14981-14988.
- 747 37. Tierney, A., and Kraus, N. (2016). Getting back on the beat: links between auditory-motor integration  
748 and precise auditory processing at fast time scales. *Eur J Neurosci* 43, 782-791.
- 749 38. Triplehorn, J.D., and Yager, D.D. (2005). Timing of praying mantis evasive responses during simulated bat  
750 attack sequences. *J Exp Biol* 208, 1867-1876.
- 751 39. Turchet, L., Camponogara, I., and Cesari, P. (2015). Interactive footstep sounds modulate the perceptual-  
752 motor aftereffect of treadmill walking. *Exp Brain Res* 233, 205-214.
- 753 40. Turchet, L., Camponogara, I., Nardello, F., Zamparo, P., and Cesari, P. (2018). Interactive footsteps  
754 sounds modulate the sense of effort without affecting the kinematics and metabolic parameters during  
755 treadmill-walking. *Appl Acoust* 129, 379-385.
- 756 41. Turchet, L., Serafin, S., and Cesari, P. (2013). Walking Pace Affected by Interactive Sounds Simulating  
757 Stepping on Different Terrains. *Acm T Appl Percept* 10.
- 758 42. Ulanovsky, N., Las, L., and Nelken, I. (2003). Processing of low-probability sounds by cortical neurons.  
759 *Nat Neurosci* 6, 391-398.
- 760 43. Vasquez-Lopez, S.A., Weissenberger, Y., Lohse, M., Keating, P., King, A.J., and Dahmen, J.C. (2017).  
761 Thalamic input to auditory cortex is locally heterogeneous but globally tonotopic. *Elife* 6.
- 762 44. Vinck, M., Batista-Brito, R., Knoblich, U., and Cardin, J.A. (2015). Arousal and locomotion make distinct  
763 contributions to cortical activity patterns and visual encoding. *Neuron* 86, 740-754.

- 764 45. Whitton, J.P., Hancock, K.E., and Polley, D.B. (2014). Immersive audiomotor game play enhances neural  
765 and perceptual salience of weak signals in noise. *Proc Natl Acad Sci U S A* *111*, E2606-2615.
- 766 46. Winkowski, D.E., and Kanold, P.O. (2013). Laminar transformation of frequency organization in auditory  
767 cortex. *J Neurosci* *33*, 1498-1508.
- 768 47. Xiong, Q., Znamenskiy, P., and Zador, A.M. (2015a). Selective corticostriatal plasticity during acquisition  
769 of an auditory discrimination task. *Nature* *521*, 348-351.
- 770 48. Xiong, Q.J., Znamenskiy, P., and Zador, A.M. (2015b). Selective corticostriatal plasticity during acquisition  
771 of an auditory discrimination task. *Nature* *521*, 348-+.
- 772 49. Yang, Y., Lee, J., and Kim, G. (2020). Integration of locomotion and auditory signals in the mouse inferior  
773 colliculus. *Elife* *9*.
- 774 50. Zhou, M., Liang, F., Xiong, X.R., Li, L., Li, H., Xiao, Z., Tao, H.W., and Zhang, L.I. (2014). Scaling down of  
775 balanced excitation and inhibition by active behavioral states in auditory cortex. *Nat Neurosci* *17*, 841-  
776 850.
- 777 51. Znamenskiy, P., and Zador, A.M. (2013a). Corticostriatal neurons in auditory cortex drive decisions  
778 during auditory discrimination. *Nature* *497*, 482-+.
- 779 52. Znamenskiy, P., and Zador, A.M. (2013b). Corticostriatal neurons in auditory cortex drive decisions  
780 during auditory discrimination. *Nature* *497*, 482-485.

781



# Tones

bioRxiv preprint doi: <https://doi.org/10.1101/2022.05.16.492071>; this version posted May 16, 2022. The copyright holder for this preprint (which was not certified by peer review) is the author/funder, who has granted bioRxiv a license to display the preprint in perpetuity. It is made available under a [CC-BY 4.0 International license](https://creativecommons.org/licenses/by/4.0/).

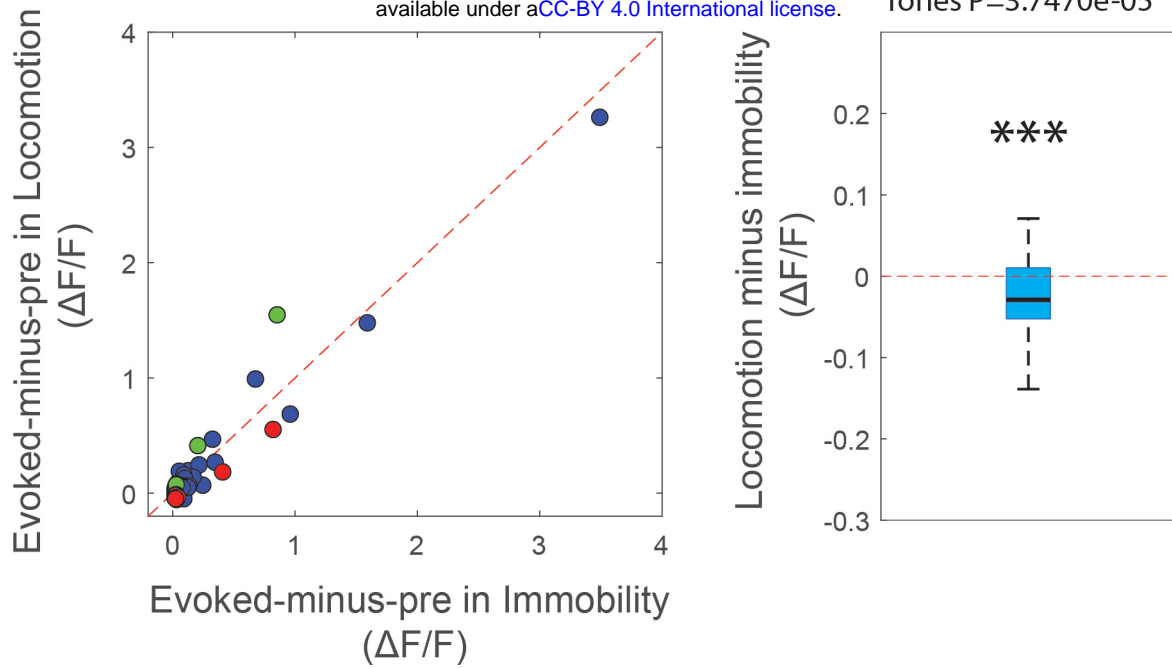

# Complex sounds

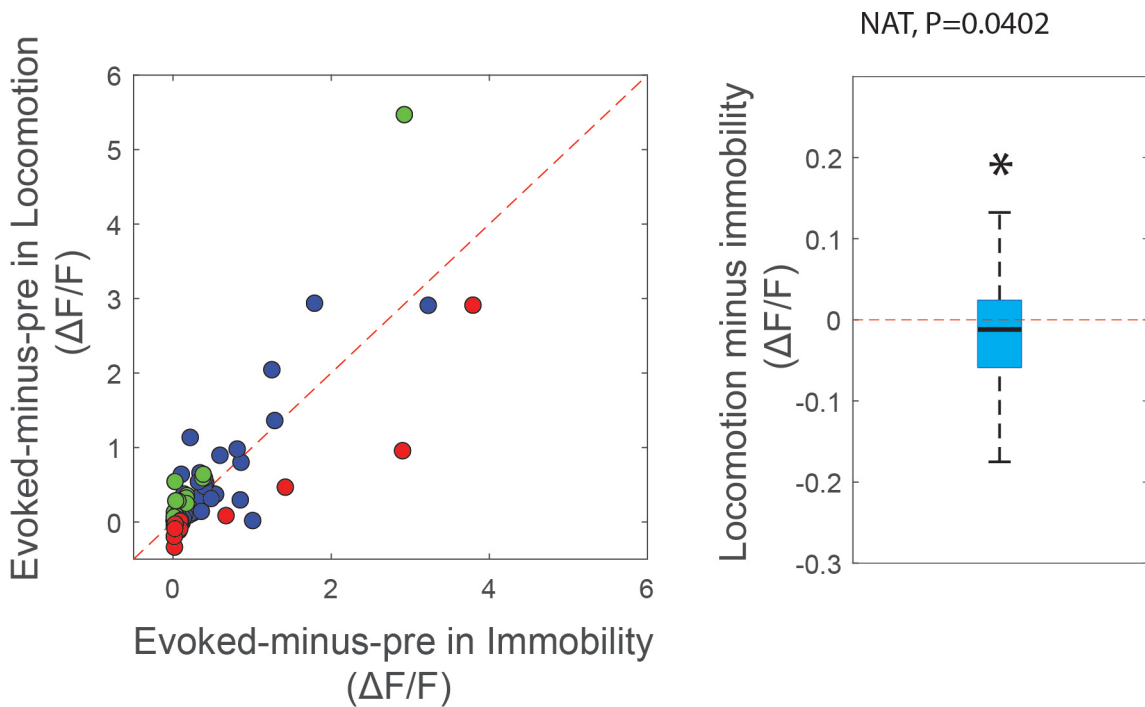

Supplementary Fig. 1: Locomotion influence on AC responses to tones and complex sounds. Baseline-subtracted sound-evoked responses in immobility and locomotion for tones (top) and complex sounds (bottom). Graphical conventions same as Fig. 1E. While individual responses showed diversity in locomotion-related influence, population-level responses to both tones and complex sounds were significantly reduced during locomotion (Tones:  $P=3.7e-5$ , Complex sounds  $P=0.0402$ , two-sided Wilcoxon signed-rank test).

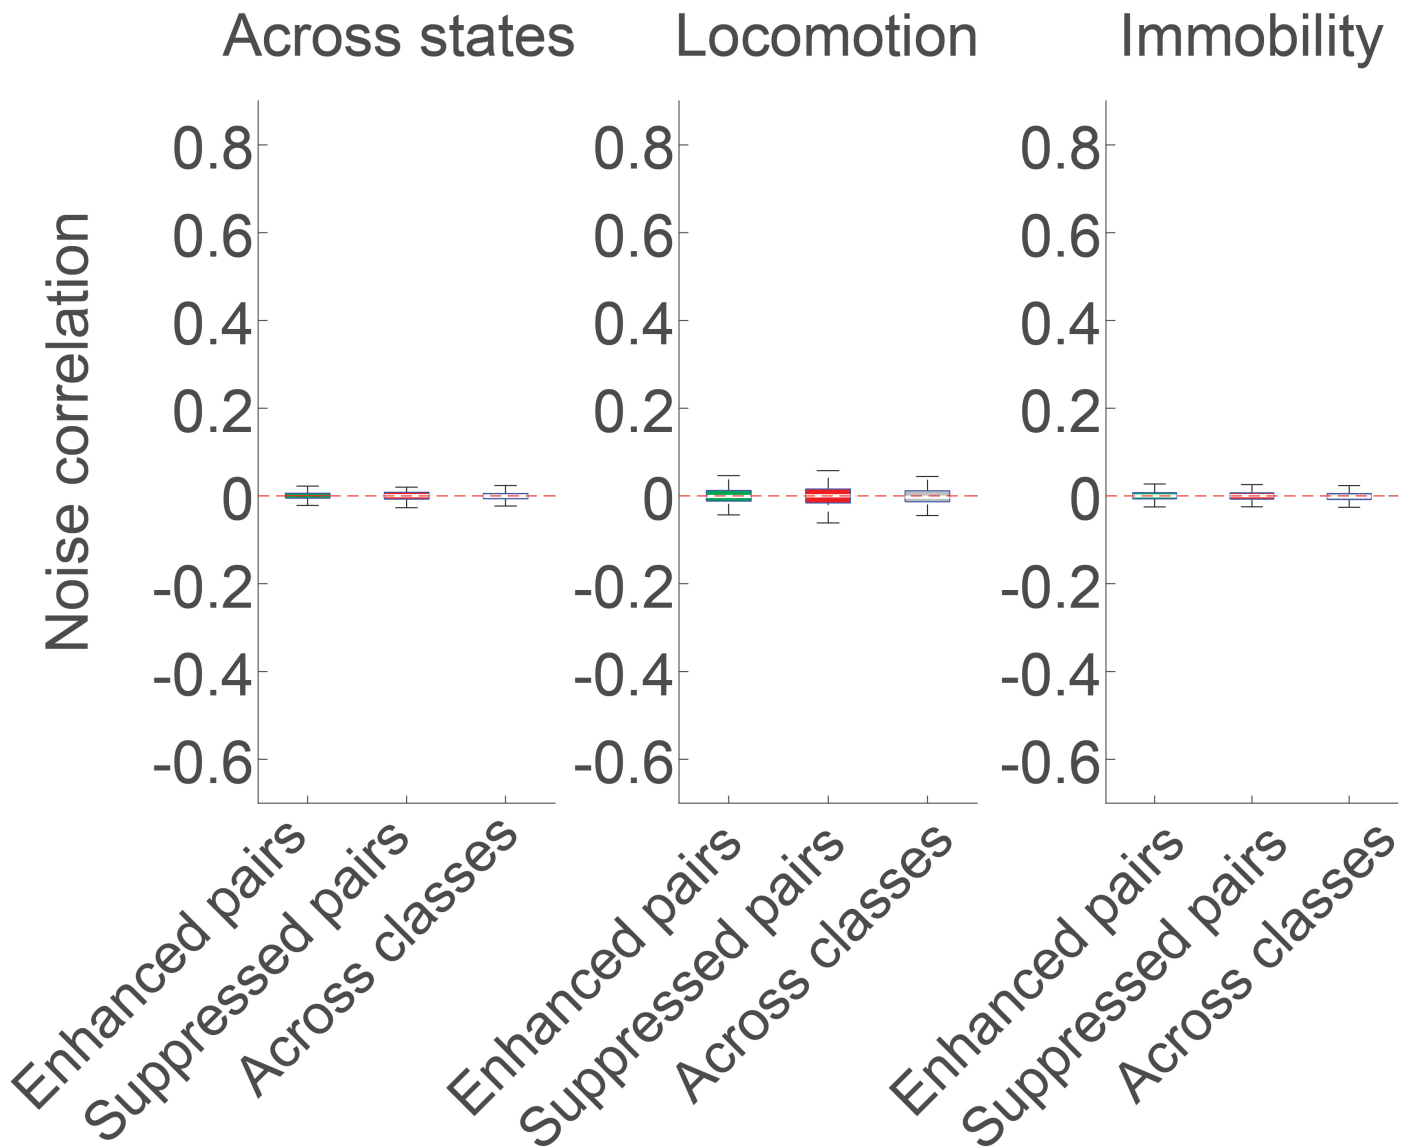

Supplementary Fig. 2: Noise correlations of trial-shuffled data. Data parallels Fig. 2G but following trial shuffling. No significant differences were observed.

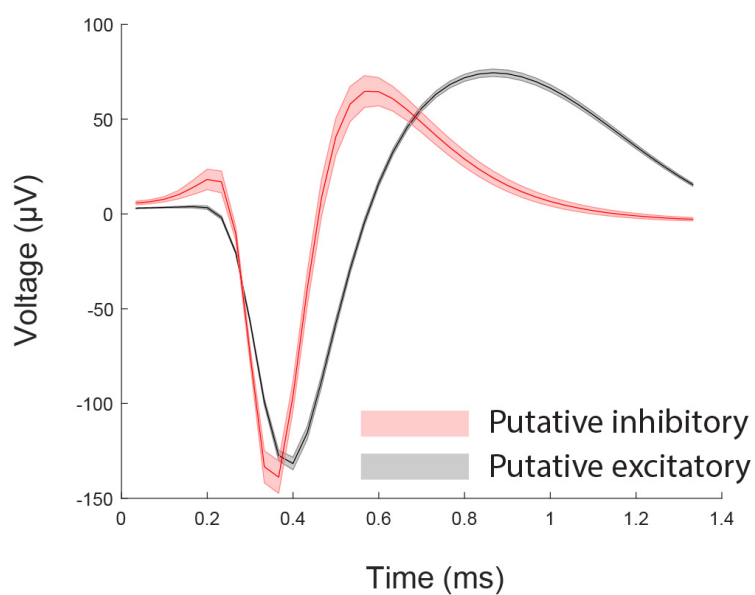

Supplementary Fig. 3: Spike waveforms of putative excitatory and inhibitory neurons. Traces show mean $\pm$ SEM of spikes from the corresponding classes. Putative inhibitory fast-spiking interneurons were excluded from analyses.
